# Supplementary material
Source: PubMed Central journal article supplement (PMC11495362)
Supplement: NIHPP2023.03.13.531369v3-supplement-1.pdf [file NIHPP2023.03.13.531369v3-supplement-1.pdf]

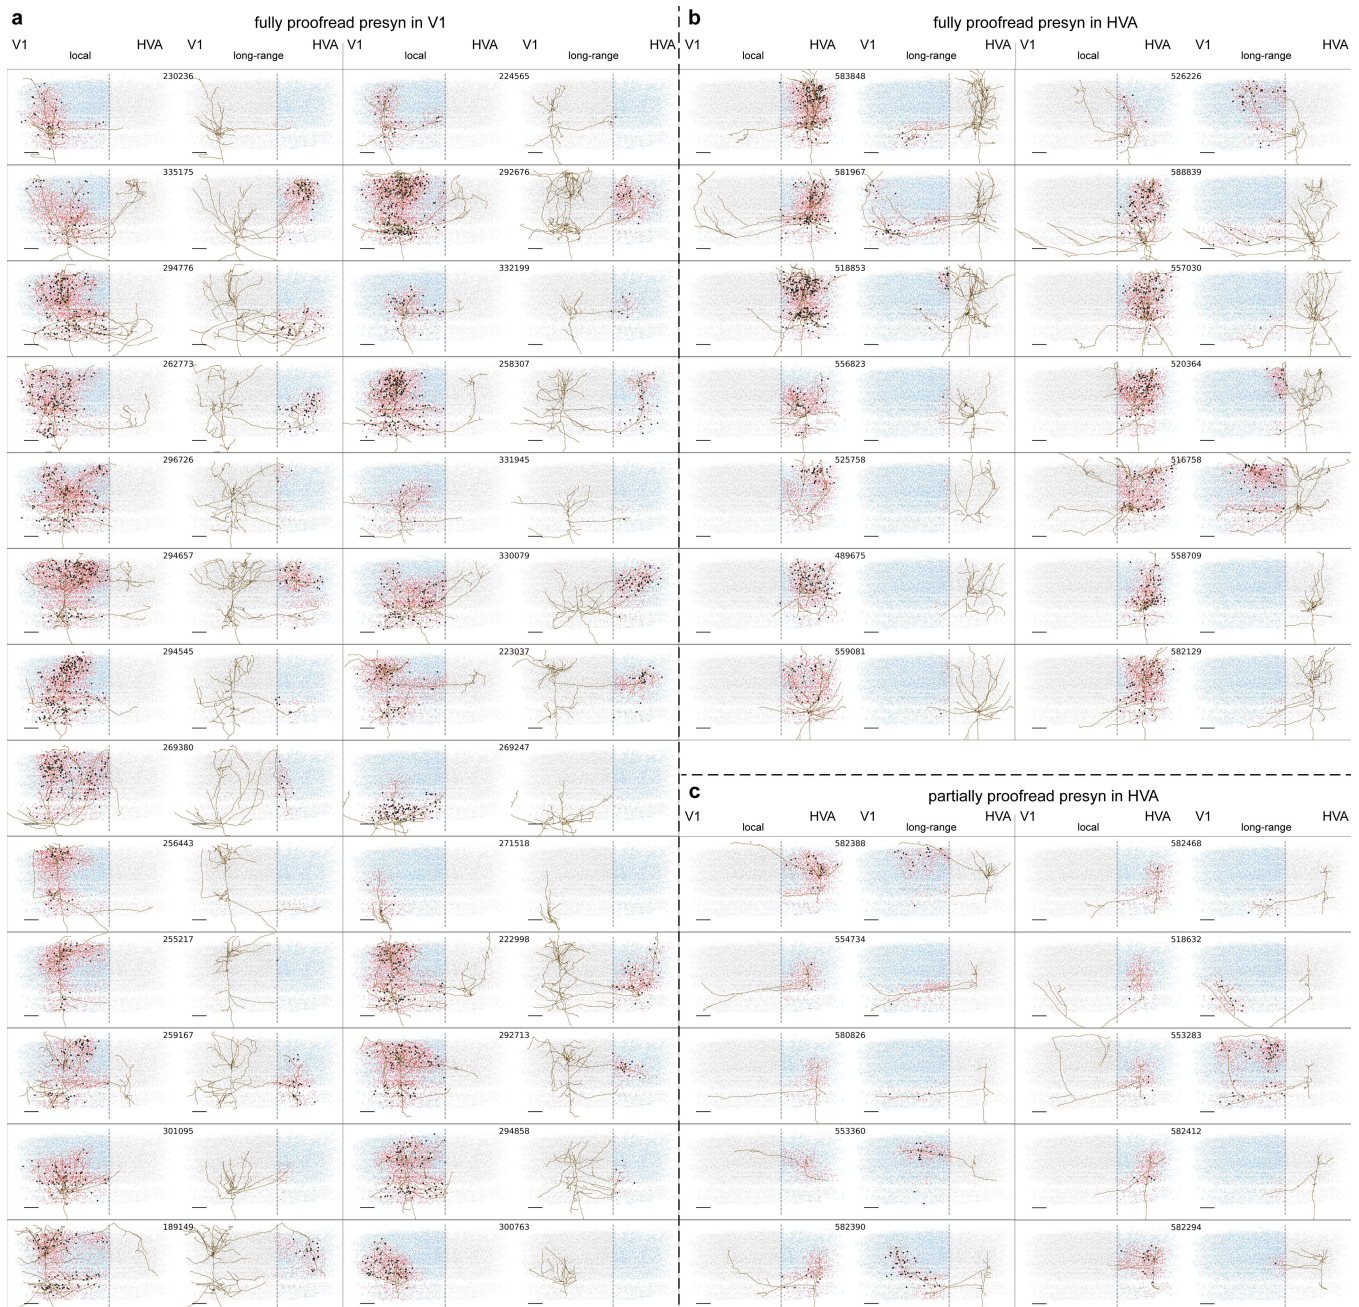

**Supplemental Figure 1. Example proofread presynaptic axons in EM cortical space and their connected, ADP, and same region controls.** The axon for every presynaptic (presyn) neuron is shown twice, once as a "local" projection type and again as a "long-range" type (even if the neuron has no local or long-range projections). The six digit ID from Table "nucleus\_detection\_v0" ([MICrONS Consortium et al., 2021](https://doi.org/10.1101/2021.03.13.431369)) is displayed above both plots. For each plot, the soma centroids of connected neurons, ADP controls, and same region controls are plotted in black, red, and blue, respectively. Gray dots are soma centroids of all other functionally matched neurons not used as controls for that presyn. The dashed gray line represents the V1-HVA boundary. Scale bar = 100 $\mu$ m. **a**, Example fully proofread presynaptic axons with somas in V1. "Fully proofread" neurons are those where a proofreader attempted to extend every axonal branch to completion. **b**, Example fully proofread presynaptic axons with somas in HVA. **c**, Example partially proofread presynaptic axons with somas in HVA. "Partially proofread" neurons are those where a proofreader only extended axonal branches that were pre-screened for whether they projected inter-areally (specifically to enrich for feedback connections).

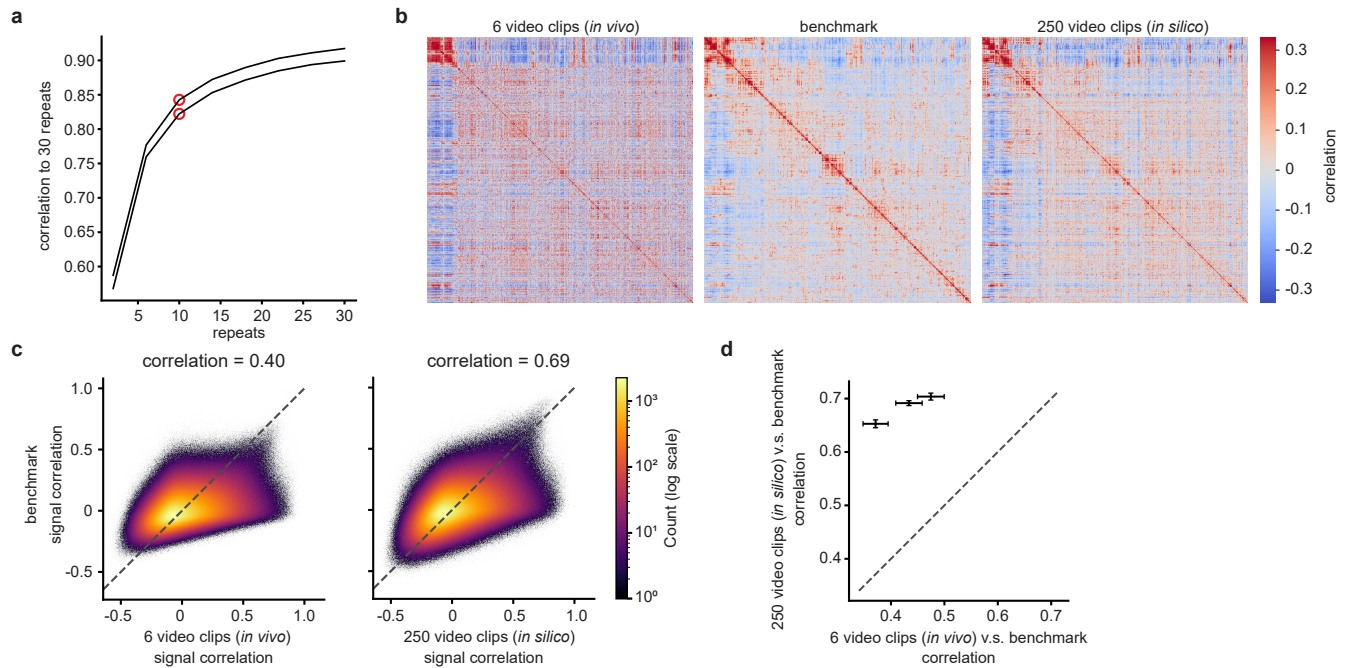

**Supplemental Figure 2. The digital twin signal correlations align better with the *in vivo* benchmark than *in vivo* signal correlations generated with less data.** **a**, Correlation of *in vivo* signal correlations generated with 6 video clips and varying numbers of repeats to *in vivo* signal correlations generated with 6 clips and 30 repeats, for two animals. 10 repeats (red marker) reasonably approximates the saturation point and is the number used for all other analyses. **b**, Signal correlation matrices of 1000 neurons generated from *in vivo* responses to 6 video clips (left), *in vivo* responses to 30 video clips (benchmark, middle) and digital twin responses to 250 video clips (*in silico*, right). The benchmark matrix is ordered by ward's hierarchical clustering. The *in vivo* and *in silico* signal correlation matrices are ordered in the same order as the benchmark matrix. The fine structure of the *in silico* matrix is qualitatively more similar to the benchmark than the *in vivo* matrix generated with 6 video clips is to the benchmark. **c**, 2D heatmaps of signal correlations from the benchmark (same benchmark as in **b**) vs *in vivo* responses to 6 video clips (left) and *in silico* responses to 250 clips (right). The correlation of *in silico* signal correlations to the benchmark is higher than the correlation of *in vivo* signal correlations generated with 6 video clips to the benchmark (0.69 vs 0.40). Colorbar: 2D bin counts in log scale. **d**, The correlation of *in silico* signal correlations to the benchmark vs the correlation of *in vivo* signal correlations generated with 6 video clips to the benchmark for three animals. Error bars are standard deviations estimated through resampling. All data points are in the upper left corner indicating that *in silico* signal correlations outperform *in vivo* signal correlations generated with 6 video clips. ( $p$ -value < 0.001 for all three animals)

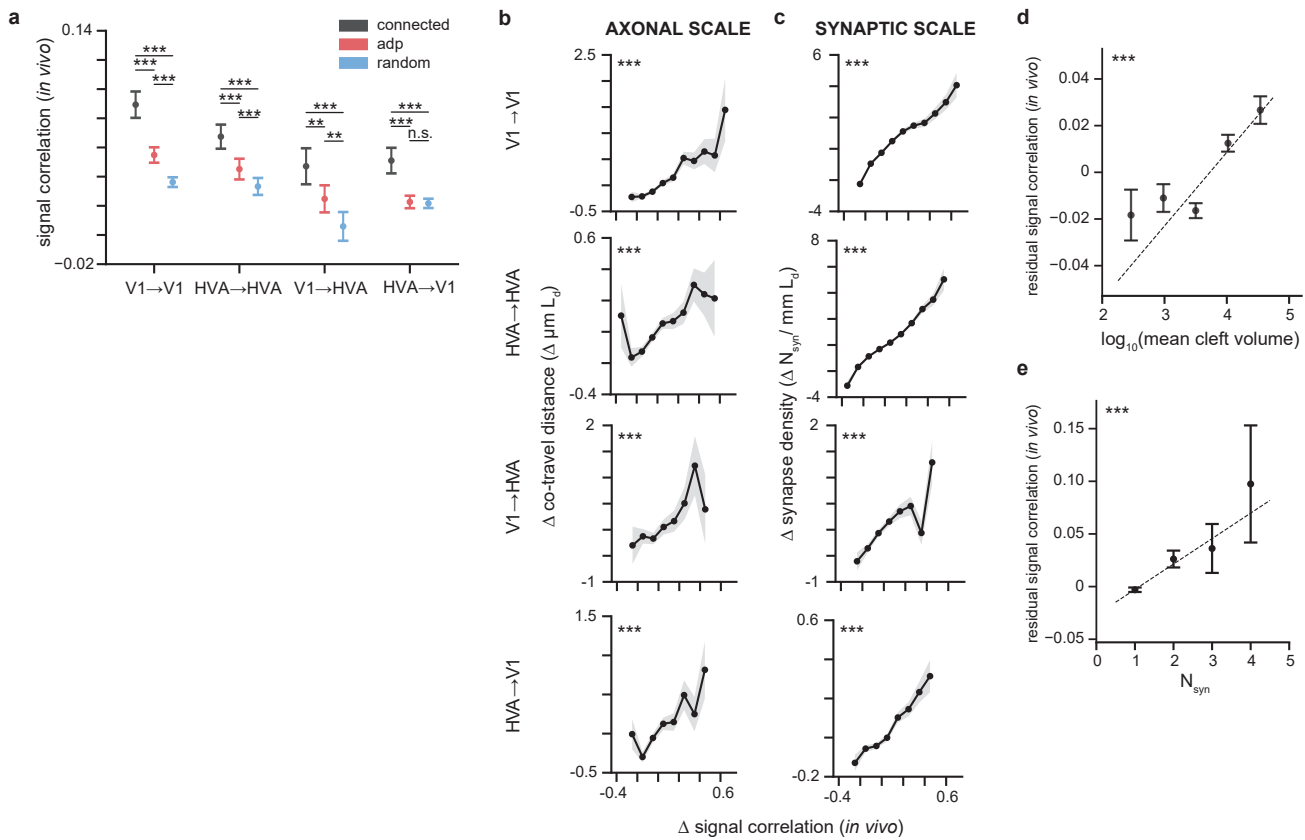

**Supplemental Figure 3. Synaptic connectivity increases with empirical signal correlations measured directly *in vivo* rather than via the digital twin.** **a**, Mean *in vivo* signal correlation is different (mean  $\pm$  sem, paired t-test) for connected pairs, ADP controls, and same area controls for all projection types, as in Fig 2d. **b**, Axon-dendrite co-travel distance ( $\mu m L_d$ ) increases in a graded fashion with *in vivo* signal correlation for all projection types, as in Fig 2e. **c** Synapse density ( $N_{syn} / mm L_d$ ) increases in a graded fashion with signal correlation, for all projection types, as in Fig 2f. The shaded regions in **b** and **c** are bootstrap-based standard deviation. **d**, Synapse size ( $\log_{10}$  cleft volume in voxels) is positively correlated with *in vivo* signal correlation after regressing out  $L_d$  (p-value by linear regression), as in Fig 2h. **e**, *In vivo* signal correlations increases with number of synapses after regressing out  $L_d$  (p-values by linear regression), as in Fig 2j. (For all panels, \* = p-value < 0.05, \*\* = p-value < 0.01, \*\*\* = p-value < 0.001, multiple comparison correction by BH procedure)



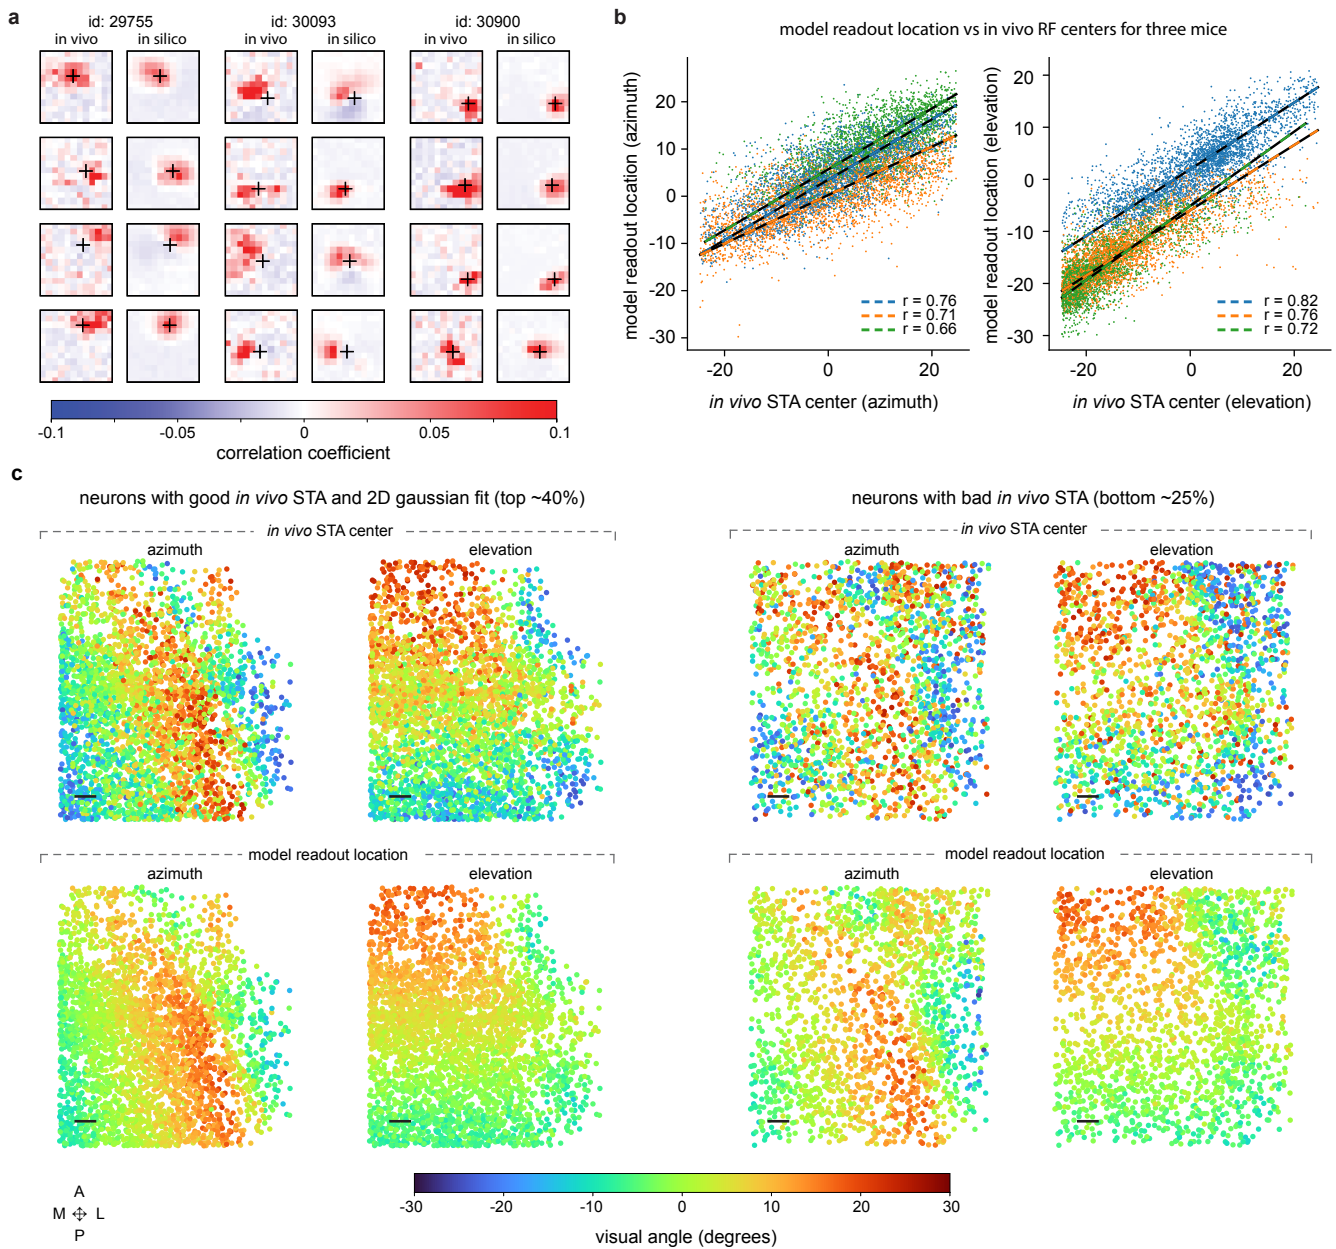

**Supplemental Figure 4. Model readout center aligns with receptive field center measured *in vivo* with sparse noise stimuli.**

**a**, Visual comparison of STAs generated from *in vivo* responses to a sparse noise stimulus (left) vs STAs generated from *in silico* responses to the same stimulus (right) for three animals (blue, orange, and green). The black cross represents the model readout location. Examples are randomly chosen from the top  $\approx 40\%$  of neurons remaining after a threshold on *in vivo* STA quality is applied. **b**, Model readout location vs *in vivo* STA center for azimuth coordinate (left) and elevation coordinate (right). **c**, Retinotopic maps for animal id: 29755. Left: Maps generated with top  $\approx 40\%$  of neurons after an *in vivo* STA quality threshold is applied. Right: Maps for the bottom  $\approx 25\%$  of neurons. Top row: maps generated from *in vivo* STA's centers. Bottom row: maps generated from the digital twin model readout location. The maps generated from the model are qualitatively less noisy, even for maps generated from neurons with poor STA quality. Colorbar: degree of visual angle for both azimuth and elevation coordinates. Anatomical axes: A = anterior, P = posterior, M = medial, L = lateral. Scale bar:  $100 \mu\text{m}$ .



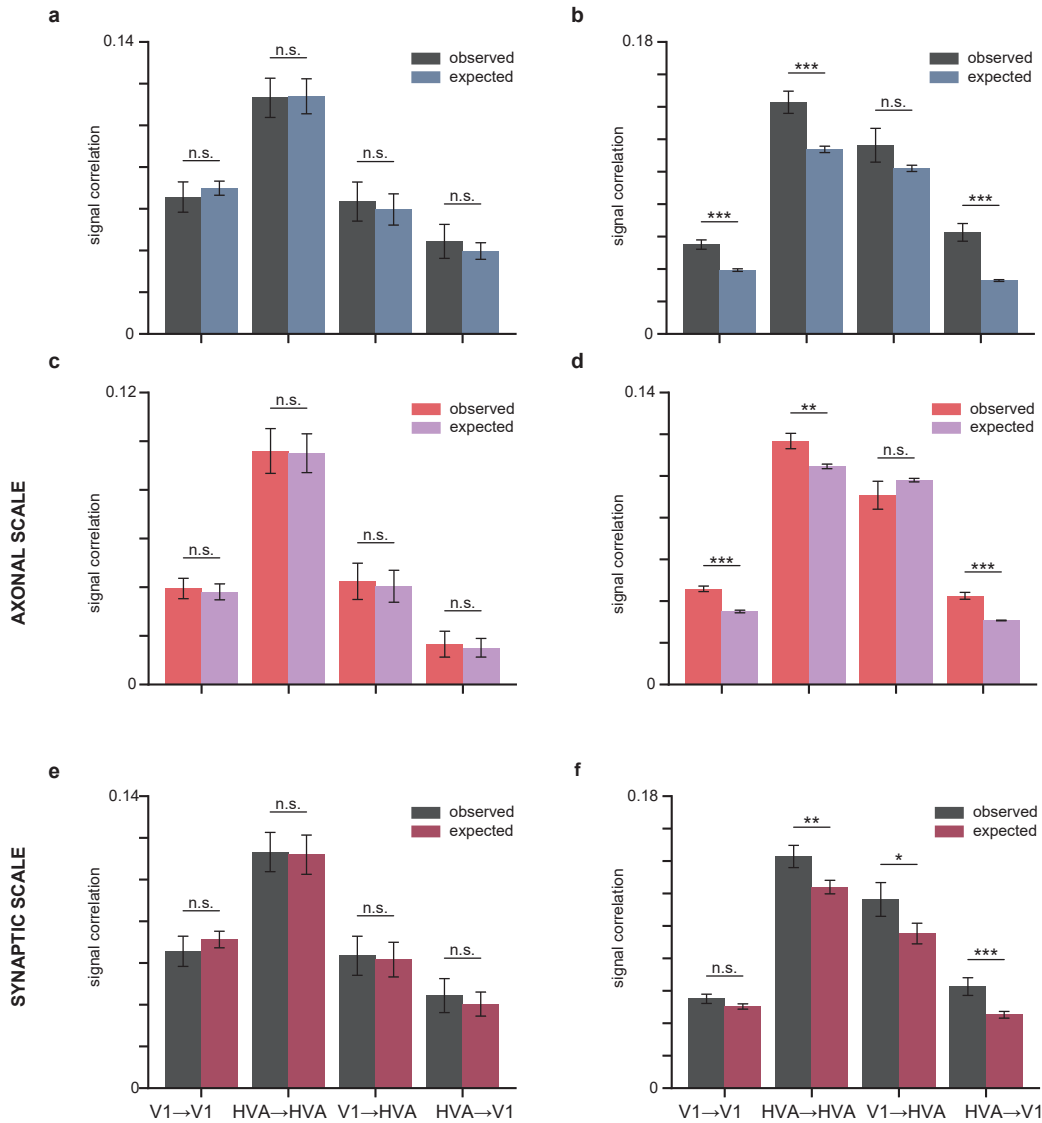

**Supplemental Figure 5. Postsyns with a common input are more similar to each other than expected by a pairwise like-to-like rule at both axonal and synaptic scale.** **a**, Mean pre-post signal correlations in the data (dark gray, "observed") and the model (blue, "expected") are not significantly different, indicating that the model reproduces the expected pairwise like-to-like rule **b**, Mean pairwise *in silico* signal correlation of postsyns, reproduced from Fig 5c. The observed data shows significantly higher postsyn to postsyn similarity than predicted by the model fit with only a pairwise rule, for three out of four projection types. **c**, As in **a**, but at "Axonal" scale. **d**, As in **b**, but at "Axonal" scale. **e**, As in **c**, but at "Synaptic" scale. **f**, As in **d**, but at "Synaptic" scale.

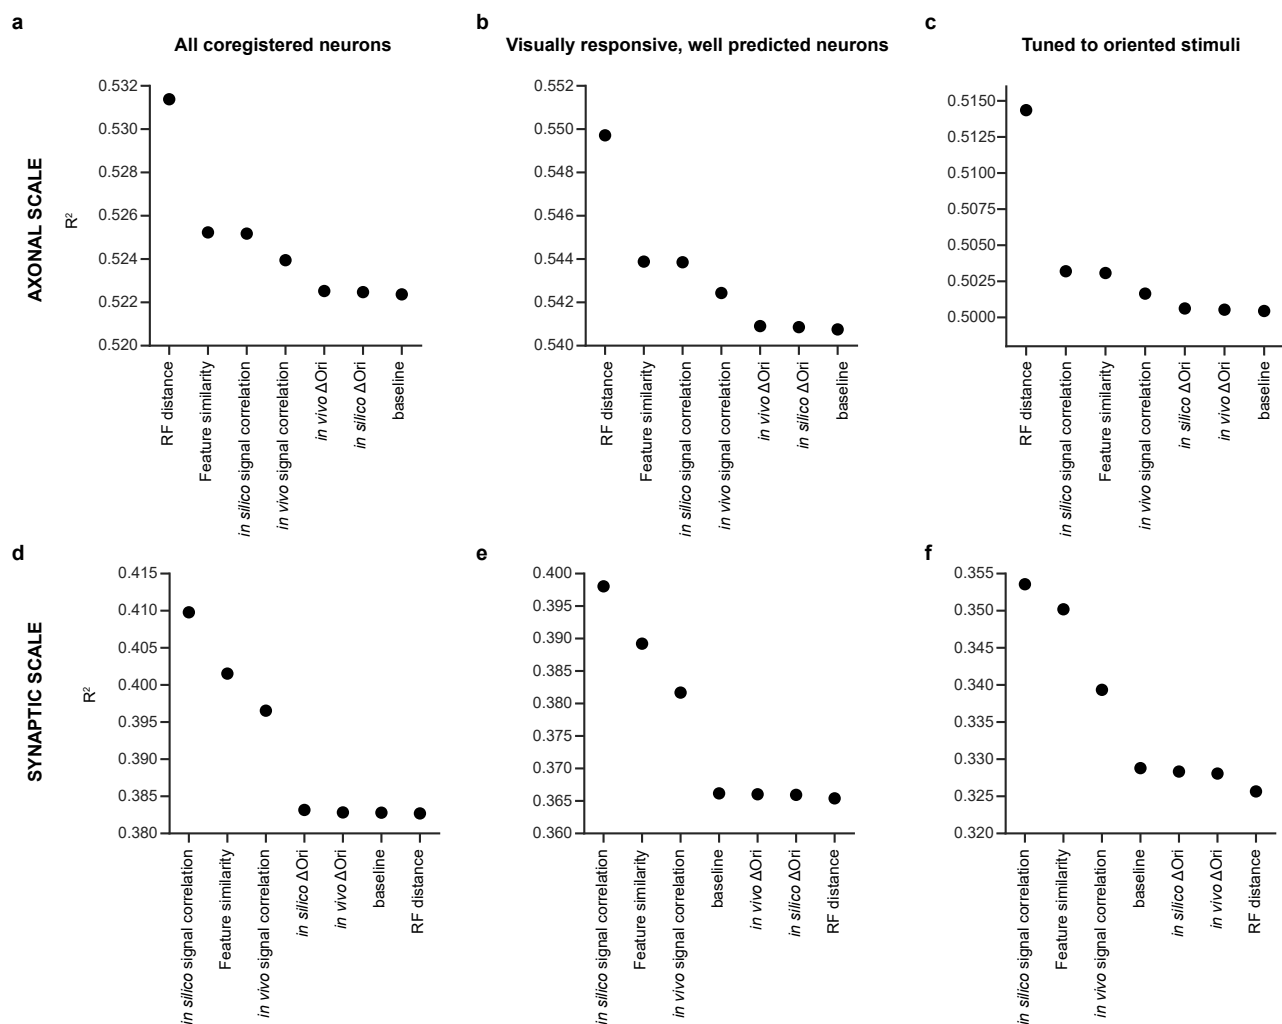

**Supplemental Figure 6. Performance of various functional metrics in predicting axon-dendrite co-travel distance ( $L_d$ , Axonal scale) or synapse density ( $N_{syn}/mmL_d$ , Synaptic scale).** Model performance of GLMMs (Nakagawa's conditional  $R^2$ ) for predicting axon-dendrite co-travel distance ( $L_d$ ): **a, b, c** and synapse density ( $N_{syn}/mmL_d$ ): **d, e, f**, for all coregistered neurons: **a, d**, all visually responsive, well predicted neurons: **b, e**, and neurons tuned to oriented stimuli: **c, f**. The GLMMs are fit to predict axon-dendrite co-travel distance or synapse density independently with each functional metric, the projection type, and the interaction between the two while considering the interaction term of projection type and presynaptic neuron identity as random effects. The baseline models were not fitted with information about functional metrics. They predict axon-dendrite co-travel distance or synapse density with the projection type alone while considering the interaction term of projection type and presynaptic neuron identity as random effects.

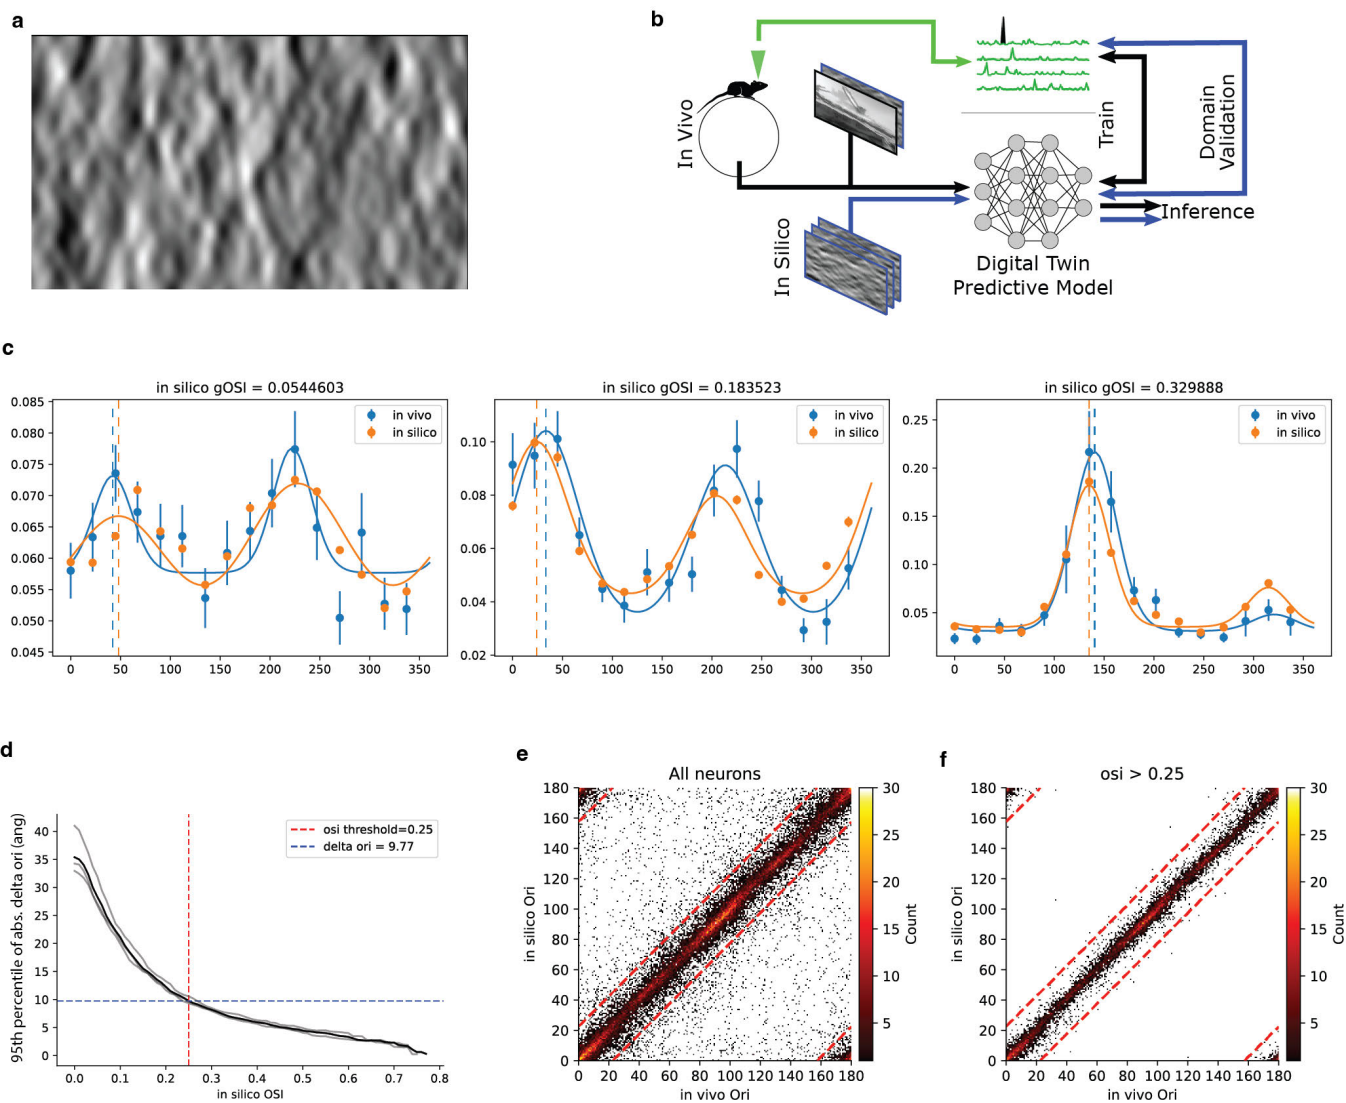

**Supplemental Figure 7. In silico orientation tuning is consistent with in vivo orientation tuning** **a**, Sample frame from global directional parametric stimulus ("Monet") used to characterize orientation and direction selectivity. Directional motion was orthogonal to orientation, and was tested at 22.5° intervals. **b**, Schematic of domain validation experimental design. In a single scan in a new animal, neuronal responses are collected in response to sufficient stimuli to both train the digital twin model (natural stimuli) and characterize orientation tuning (Monet) from *in vivo* responses. Later, *in silico* orientation tuning is extracted from model responses to parametric stimuli, and compared against *in vivo* orientation tuning for the same neurons. **c**, Comparison of *in silico* and *in vivo* mean responses per stimulus direction (mean  $\pm$  SEM), fitted tuning curves (lines), and extracted preferred orientation (dotted lines) for three neurons. **d**, 95th percentile difference in preferred orientation between *in silico* and *in vivo* fitted responses as a function of gOSI threshold. Dotted lines correspond to gOSI > 0.25 threshold applied for all analyses and resulting 95th percentile difference in preferred orientation  $\approx$  9.77° across all three animals imaged. Lines correspond to individual animals (gray) or cumulative across all animals (black). **e**, **f**, Two-dimensional histogram of *in silico* versus *in vivo* preferred orientation for all neurons across three animals (**e**) and only neurons with gOSI > 0.25 (**f**).



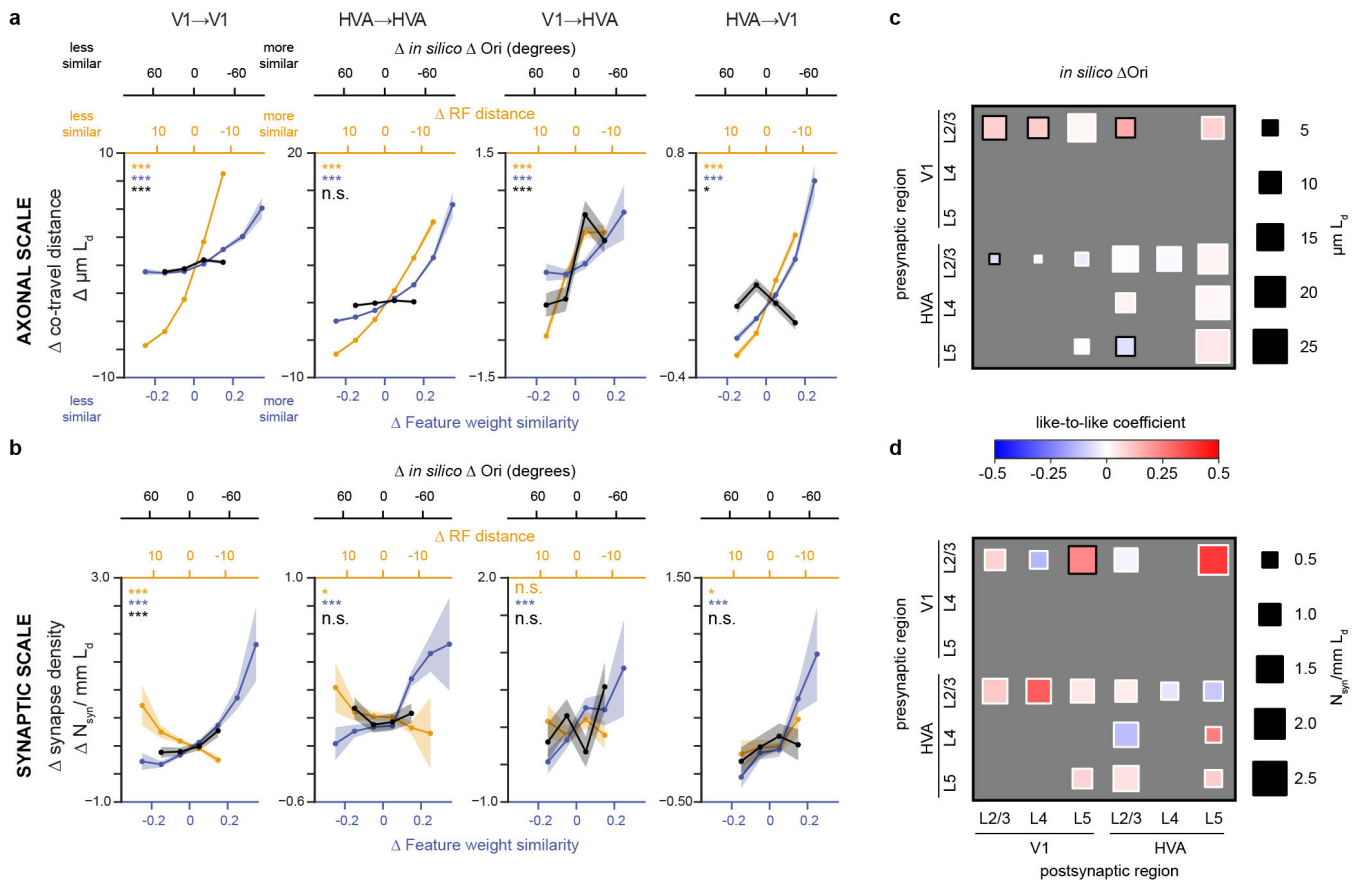

**Supplemental Figure 8. Analysis repeated with *in silico* orientation preference.** **a**, Difference in preferred orientation ( $\Delta$  Ori) derived from *in silico* responses to parametric stimuli for tuned ( $g\text{OSI} > 0.25$ ) neurons along with both feature weight similarity and receptive field center distance (reproduced from Fig 3) at axonal scale. **b**, same as in **a**, at synaptic scale. **c**, Area/ layer joint membership breakout as in Fig 4 for *in silico*  $\Delta$  ori at axonal scale. **d**, As in **c** but at synaptic scale. All analyses are centered per presyn by accounting for the presyn mean (e.g.  $\Delta$  feature weight similarity). For details, see Supplemental Tab. 13, 14, 17, 18, 21, 22, 31, 32,

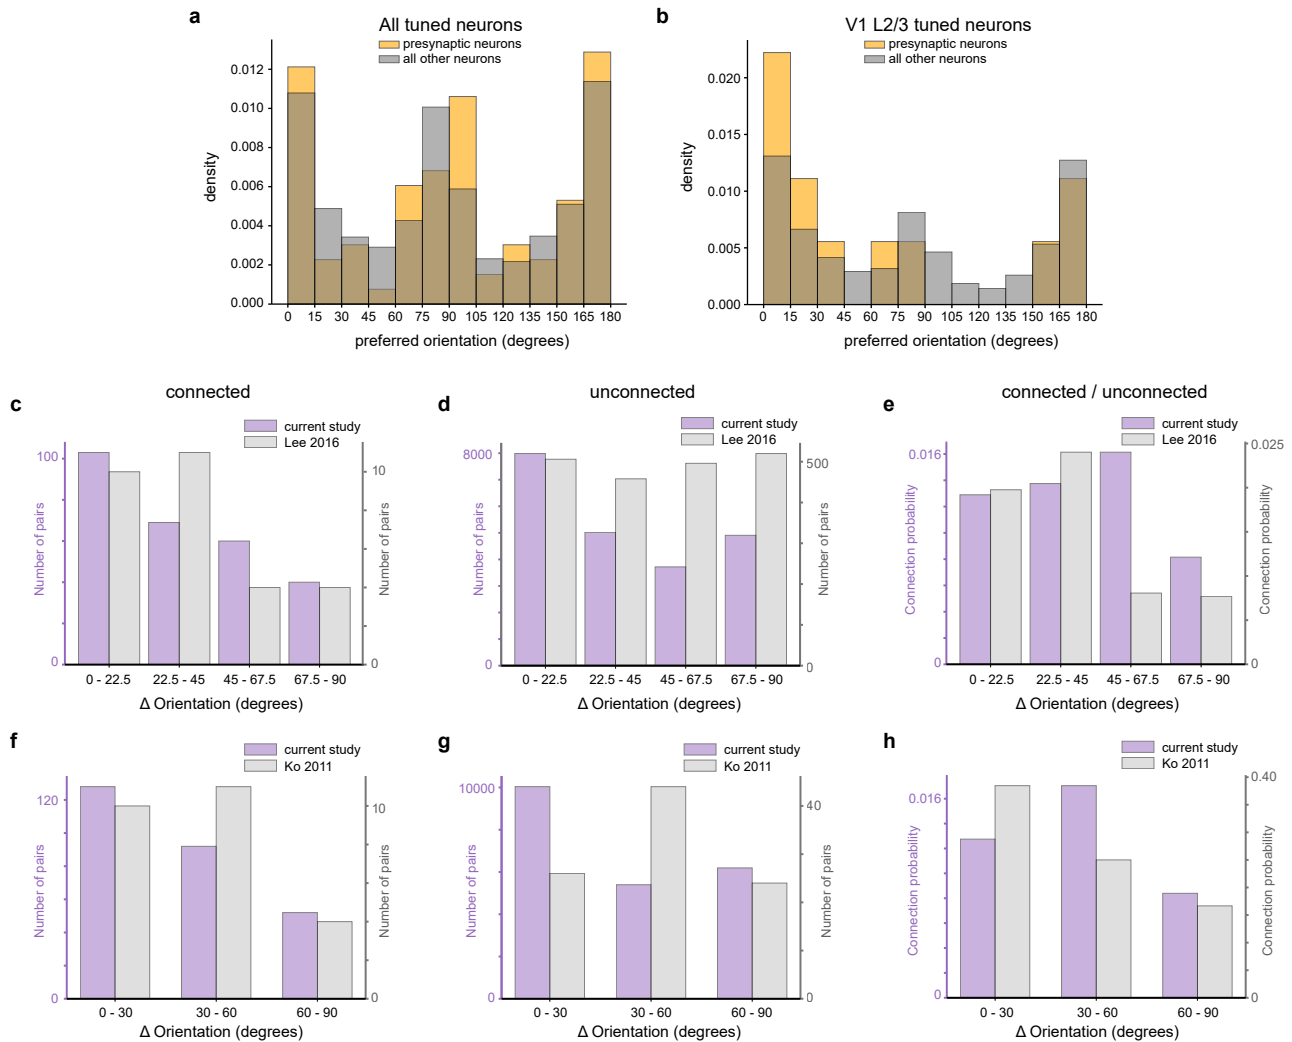

**Supplemental Figure 9. Distribution of *in silico* orientation preference and comparison to previous literature.** **a**, Distribution of orientation preference of tuned neurons (gOSI > 0.25) derived from *in silico* responses to parametric stimuli (see Methods). Note the cardinal bias in orientation preference distribution, in which orientation preference for 0 and 90 degree angles is overrepresented. Gold: presynaptic neurons, Gray: all other neurons. **b**, As in **a** but for tuned neurons in V1 L2/3. Difference in preferred orientation ( $\Delta$  Orientation) for neurons in V1 L2/3 for connected pairs (**c**, **f**), unconnected pairs (**d**, **g**), and the ratio of connected / unconnected ("connection probability", **e**, **h**) for our study vs Lee et al. 2016 (**c-e**) and vs Ko et al. 2011 (**f-h**). The connected V1 L2/3 neurons in our study show a strong like-to-like effect, consistent with both Lee et al. 2016 and Ko et al. 2011 (**c**, **f**), however unlike Lee et al. 2016 and Ko et al. 2011, the unconnected neurons in our study also show a strong like-to-like effect (**d**, **g**) indicating that the like-to-like effect seen in connected pairs results from an orientation preference bias. This bias likely explains why we do not observe significant a like-to-like effect between V1 L2/3 neurons at axonal scale or synaptic scale in Supplemental. Fig 8, (i.e. when pairs are tested against region-matched controls).

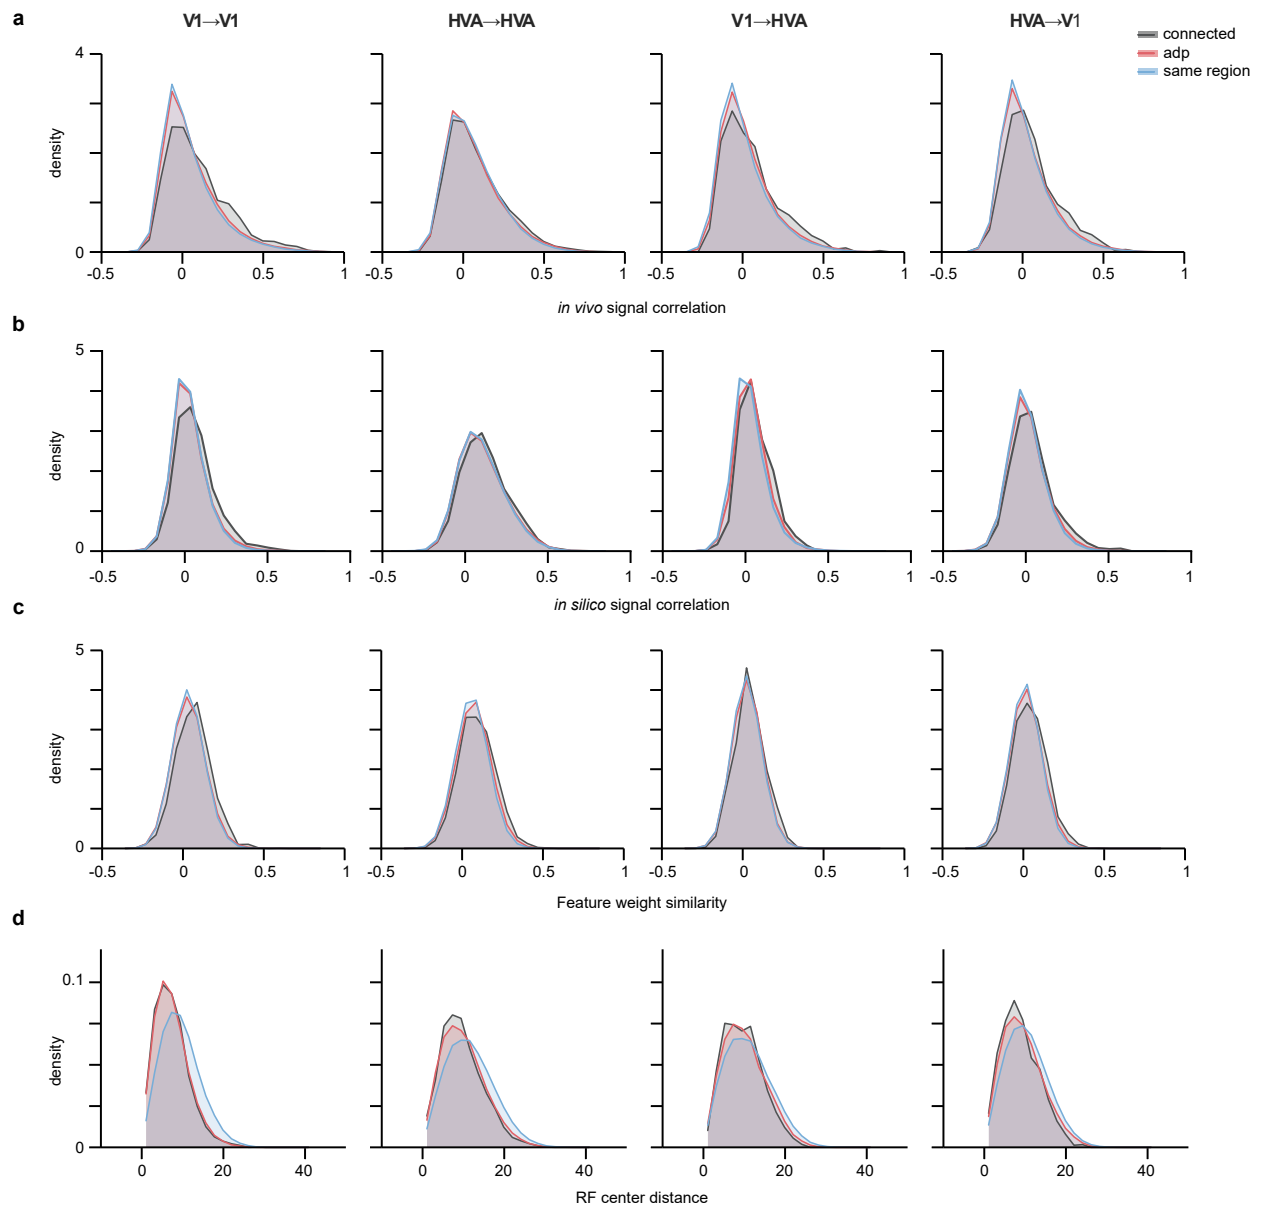

**Supplemental Figure 10. Distribution of pairwise functional measurements.** Density distribution of connected pairs (black), ADP control pairs (red) and same region control pairs (blue) for *in vivo* signal correlations (**a**), *in silico* signal correlations (**b**), feature weight similarity (**c**), and RF center distance (**d**) for all projection types.



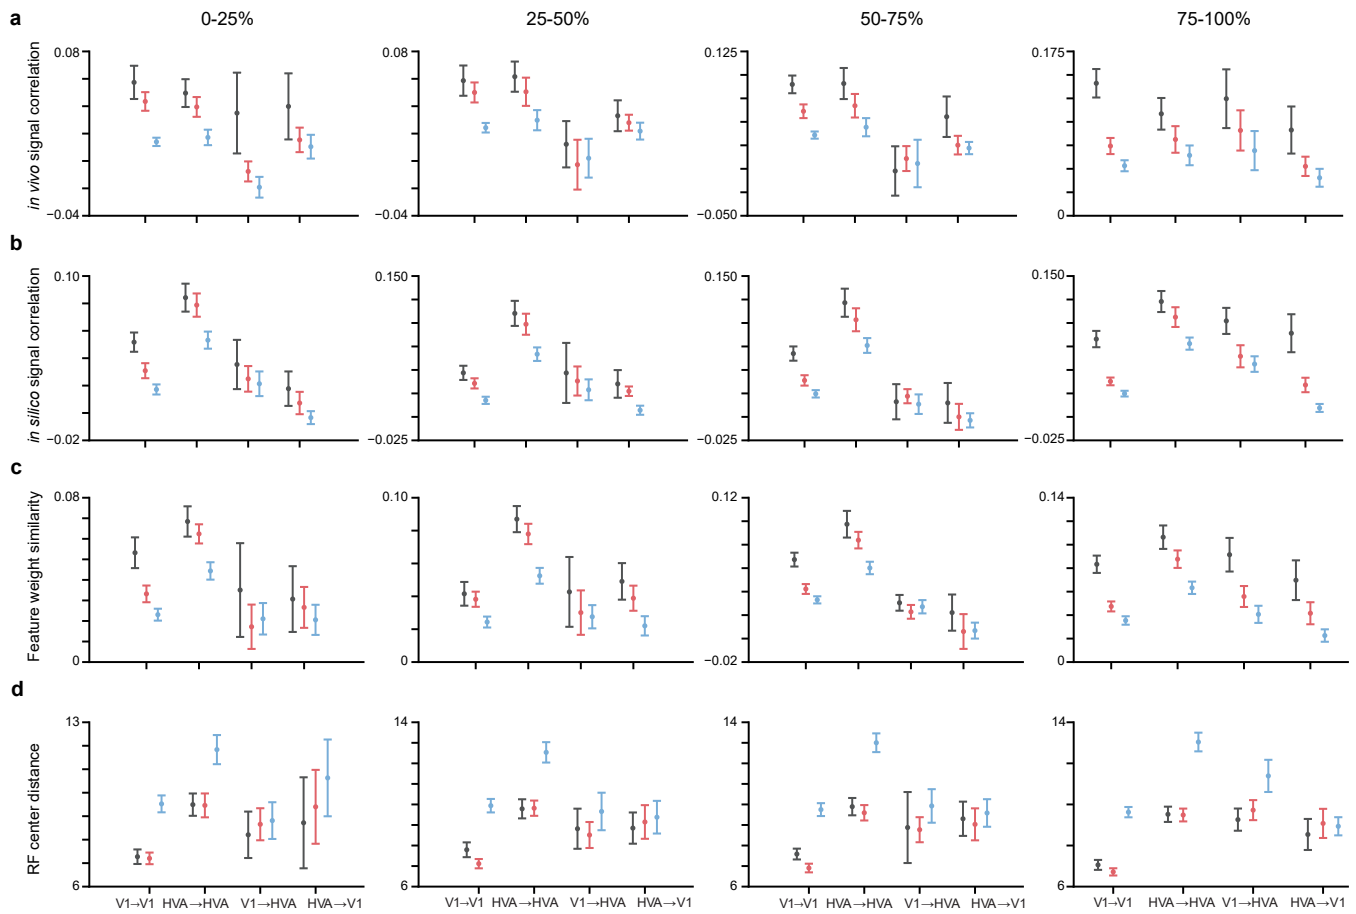

**Supplemental Figure 11. Pairwise functional measurements across varying levels of model predictive performance.** Mean of *in vivo* signal correlations (**a**), *in silico* signal correlations (**b**), feature weight similarity (**c**), and RF center distance (**d**) for all projection types across 4 quantiles of model predictive performance ( $CC_{abs}$ ). All panels share a base filtering for visual responsiveness ( $CC_{max} > 0.4$ , 90% of neurons pass this threshold). Presynaptic neurons are filtered to  $CC_{abs} > 0.2$  (4 did not pass this threshold).

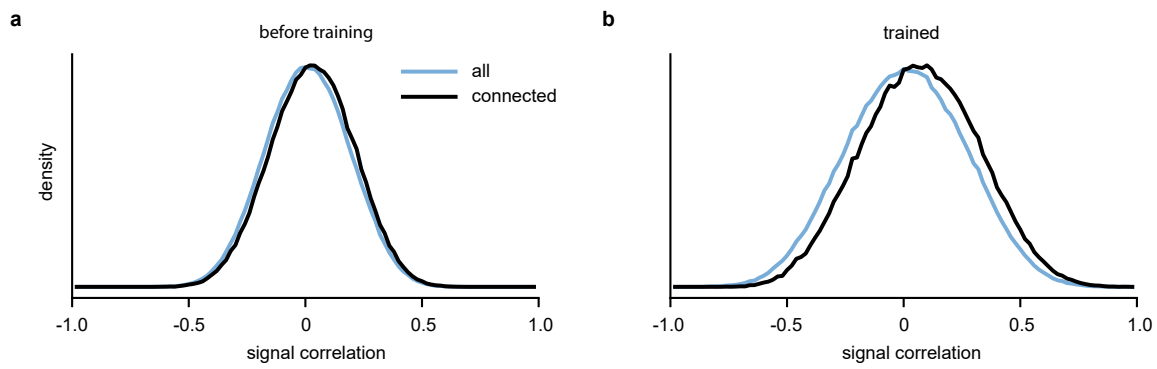

**Supplemental Figure 12. Signal correlation distributions for connected neurons vs all neurons in the RNN before and after training.**

**a**, Signal correlation distribution for connected neurons vs all neurons in the RNN before training. A neuron pair was classified as connected if the associated weight was in the top 35<sup>th</sup> percentile of all weights. **b**, Same as **a** except after training.

**Supplemental Table 1.** Proofread presynaptic neuron nucleus ID's, area, layer, and proofreading strategy. nucleus\_id's are from CAVE table nucleus\_detection\_v0

| index | nucleus_id | area | layer | proofreading strategy       |
|-------|------------|------|-------|-----------------------------|
| 1     | 189149     | V1   | L2/3  | full cleaning and extension |
| 2     | 222998     | V1   | L2/3  | full cleaning and extension |
| 3     | 223037     | V1   | L2/3  | full cleaning and extension |
| 4     | 224565     | V1   | L2/3  | full cleaning and extension |
| 5     | 225498     | V1   | L4    | full cleaning and extension |
| 6     | 230236     | V1   | L5    | full cleaning and extension |
| 7     | 236197     | V1   | L6    | full cleaning and extension |
| 8     | 255217     | V1   | L2/3  | full cleaning and extension |
| 9     | 256443     | V1   | L2/3  | full cleaning and extension |
| 10    | 256576     | V1   | L2/3  | full cleaning and extension |
| 11    | 258307     | V1   | L2/3  | full cleaning and extension |
| 12    | 259167     | V1   | L2/3  | full cleaning and extension |
| 13    | 262773     | V1   | L4    | full cleaning and extension |
| 14    | 264870     | V1   | L4    | full cleaning and extension |
| 15    | 269247     | V1   | L6    | full cleaning and extension |
| 16    | 269380     | V1   | L6    | full cleaning and extension |
| 17    | 271518     | V1   | L6    | full cleaning and extension |
| 18    | 292676     | V1   | L2/3  | full cleaning and extension |
| 19    | 292685     | V1   | L2/3  | full cleaning and extension |
| 20    | 292713     | V1   | L2/3  | full cleaning and extension |
| 21    | 294484     | V1   | L2/3  | full cleaning and extension |
| 22    | 294545     | V1   | L2/3  | full cleaning and extension |
| 23    | 294657     | V1   | L2/3  | full cleaning and extension |
| 24    | 294776     | V1   | L2/3  | full cleaning and extension |
| 25    | 294858     | V1   | L2/3  | full cleaning and extension |
| 26    | 294897     | V1   | L2/3  | full cleaning and extension |
| 27    | 296726     | V1   | L2/3  | full cleaning and extension |
| 28    | 300763     | V1   | L5    | full cleaning and extension |
| 29    | 301095     | V1   | L5    | full cleaning and extension |
| 30    | 301189     | V1   | L5    | full cleaning and extension |
| 31    | 327859     | V1   | L2/3  | full cleaning and extension |
| 32    | 330079     | V1   | L4    | full cleaning and extension |
| 33    | 330326     | V1   | L4    | full cleaning and extension |
| 34    | 331945     | V1   | L5    | full cleaning and extension |
| 35    | 332199     | V1   | L4    | full cleaning and extension |
| 36    | 335175     | V1   | L5    | full cleaning and extension |
| 37    | 460053     | RL   | L4    | full cleaning and extension |
| 38    | 460391     | RL   | L5    | full cleaning and extension |
| 39    | 487512     | RL   | L2/3  | full cleaning and extension |
| 40    | 489675     | RL   | L2/3  | full cleaning and extension |
| 41    | 493419     | RL   | L5    | full cleaning and extension |
| 42    | 493806     | RL   | L5    | full cleaning and extension |
| 43    | 493885     | RL   | L5    | full cleaning and extension |
| 44    | 493968     | RL   | L4    | full cleaning and extension |
| 45    | 516758     | RL   | L2/3  | full cleaning and extension |
| 46    | 517056     | RL   | L2/3  | full cleaning and extension |
| 47    | 518848     | RL   | L2/3  | full cleaning and extension |
| 48    | 518853     | AL   | L2/3  | full cleaning and extension |
| 49    | 518898     | RL   | L2/3  | full cleaning and extension |
| 50    | 520364     | RL   | L4    | full cleaning and extension |
| 51    | 522656     | RL   | L4    | full cleaning and extension |
| 52    | 524491     | RL   | L5    | full cleaning and extension |
| 53    | 525405     | RL   | L5    | full cleaning and extension |
| 54    | 525498     | RL   | L5    | full cleaning and extension |
| 55    | 525758     | RL   | L5    | full cleaning and extension |
| 56    | 553325     | RL   | L2/3  | full cleaning and extension |
| 57    | 554200     | AL   | L2/3  | full cleaning and extension |
| 58    | 554741     | RL   | L2/3  | full cleaning and extension |
| 59    | 554833     | RL   | L4    | full cleaning and extension |
| 60    | 554921     | RL   | L2/3  | full cleaning and extension |
| 61    | 556823     | RL   | L4    | full cleaning and extension |
| 62    | 557030     | RL   | L4    | full cleaning and extension |
| 63    | 557121     | RL   | L4    | full cleaning and extension |
| 64    | 558684     | RL   | L5    | full cleaning and extension |
| 65    | 558709     | RL   | L4    | full cleaning and extension |
| 66    | 559081     | RL   | L5    | full cleaning and extension |

Continued on next page



**Supplemental Table 1. Proofread presynaptic neuron nucleus ID's, area, layer, and proofreading strategy**

| index | nucleus_id | area | layer | proofreading strategy                      |
|-------|------------|------|-------|--------------------------------------------|
| 67    | 559381     | RL   | L5    | full cleaning and extension                |
| 68    | 560109     | RL   | L5    | full cleaning and extension                |
| 69    | 560217     | RL   | L5    | full cleaning and extension                |
| 70    | 560530     | RL   | L5    | full cleaning and extension                |
| 71    | 560732     | RL   | L5    | full cleaning and extension                |
| 72    | 562808     | RL   | L5    | full cleaning and extension                |
| 73    | 581967     | AL   | L2/3  | full cleaning and extension                |
| 74    | 582056     | AL   | L2/3  | full cleaning and extension                |
| 75    | 582129     | AL   | L2/3  | full cleaning and extension                |
| 76    | 582210     | AL   | L2/3  | full cleaning and extension                |
| 77    | 583848     | AL   | L2/3  | full cleaning and extension                |
| 78    | 583961     | RL   | L2/3  | full cleaning and extension                |
| 79    | 585723     | RL   | L4    | full cleaning and extension                |
| 80    | 587426     | AL   | L4    | full cleaning and extension                |
| 81    | 588839     | RL   | L5    | full cleaning and extension                |
| 82    | 588983     | AL   | L5    | full cleaning and extension                |
| 83    | 610498     | AL   | L2/3  | full cleaning and extension                |
| 84    | 616159     | AL   | L5    | full cleaning and extension                |
| 85    | 516621     | RL   | L2/3  | full cleaning and partial axonal extension |
| 86    | 516988     | RL   | L2/3  | full cleaning and partial axonal extension |
| 87    | 517993     | RL   | L2/3  | full cleaning and partial axonal extension |
| 88    | 518004     | RL   | L2/3  | full cleaning and partial axonal extension |
| 89    | 518134     | RL   | L2/3  | full cleaning and partial axonal extension |
| 90    | 518224     | RL   | L2/3  | full cleaning and partial axonal extension |
| 91    | 518312     | RL   | L2/3  | full cleaning and partial axonal extension |
| 92    | 518623     | RL   | L2/3  | full cleaning and partial axonal extension |
| 93    | 518632     | RL   | L2/3  | full cleaning and partial axonal extension |
| 94    | 519746     | RL   | L2/3  | full cleaning and partial axonal extension |
| 95    | 520027     | RL   | L4    | full cleaning and partial axonal extension |
| 96    | 520182     | RL   | L2/3  | full cleaning and partial axonal extension |
| 97    | 551802     | RL   | L2/3  | full cleaning and partial axonal extension |
| 98    | 553216     | RL   | L2/3  | full cleaning and partial axonal extension |
| 99    | 553283     | RL   | L2/3  | full cleaning and partial axonal extension |
| 100   | 553321     | RL   | L2/3  | full cleaning and partial axonal extension |
| 101   | 553339     | RL   | L2/3  | full cleaning and partial axonal extension |
| 102   | 553360     | RL   | L2/3  | full cleaning and partial axonal extension |
| 103   | 553469     | RL   | L2/3  | full cleaning and partial axonal extension |
| 104   | 553556     | RL   | L2/3  | full cleaning and partial axonal extension |
| 105   | 553585     | RL   | L2/3  | full cleaning and partial axonal extension |
| 106   | 553589     | RL   | L2/3  | full cleaning and partial axonal extension |
| 107   | 554734     | RL   | L2/3  | full cleaning and partial axonal extension |
| 108   | 554775     | RL   | L2/3  | full cleaning and partial axonal extension |
| 109   | 554891     | RL   | L2/3  | full cleaning and partial axonal extension |
| 110   | 554900     | RL   | L2/3  | full cleaning and partial axonal extension |
| 111   | 555010     | RL   | L2/3  | full cleaning and partial axonal extension |
| 112   | 580774     | AL   | L2/3  | full cleaning and partial axonal extension |
| 113   | 580826     | AL   | L2/3  | full cleaning and partial axonal extension |
| 114   | 580905     | AL   | L2/3  | full cleaning and partial axonal extension |
| 115   | 580948     | RL   | L2/3  | full cleaning and partial axonal extension |
| 116   | 580988     | AL   | L2/3  | full cleaning and partial axonal extension |
| 117   | 581988     | AL   | L2/3  | full cleaning and partial axonal extension |
| 118   | 581998     | AL   | L2/3  | full cleaning and partial axonal extension |
| 119   | 582011     | AL   | L2/3  | full cleaning and partial axonal extension |
| 120   | 582091     | AL   | L2/3  | full cleaning and partial axonal extension |
| 121   | 582294     | AL   | L2/3  | full cleaning and partial axonal extension |
| 122   | 582313     | RL   | L2/3  | full cleaning and partial axonal extension |
| 123   | 582353     | AL   | L2/3  | full cleaning and partial axonal extension |
| 124   | 582388     | RL   | L2/3  | full cleaning and partial axonal extension |
| 125   | 582390     | RL   | L2/3  | full cleaning and partial axonal extension |
| 126   | 582409     | RL   | L2/3  | full cleaning and partial axonal extension |
| 127   | 582412     | RL   | L2/3  | full cleaning and partial axonal extension |
| 128   | 582414     | RL   | L2/3  | full cleaning and partial axonal extension |
| 129   | 582444     | RL   | L2/3  | full cleaning and partial axonal extension |
| 130   | 582468     | RL   | L2/3  | full cleaning and partial axonal extension |
| 131   | 582471     | RL   | L2/3  | full cleaning and partial axonal extension |
| 132   | 583659     | AL   | L2/3  | full cleaning and partial axonal extension |
| 133   | 583739     | AL   | L2/3  | full cleaning and partial axonal extension |
| 134   | 583741     | AL   | L2/3  | full cleaning and partial axonal extension |

Continued on next page

**Supplemental Table 1. Proofread presynaptic neuron nucleus ID's, area, layer, and proofreading strategy**

| index | nucleus_id | area | layer | proofreading strategy                      |
|-------|------------|------|-------|--------------------------------------------|
| 135   | 583792     | AL   | L2/3  | full cleaning and partial axonal extension |
| 136   | 583891     | RL   | L2/3  | full cleaning and partial axonal extension |
| 137   | 584004     | RL   | L2/3  | full cleaning and partial axonal extension |
| 138   | 608166     | AL   | L2/3  | full cleaning and partial axonal extension |
| 139   | 608213     | AL   | L2/3  | full cleaning and partial axonal extension |
| 140   | 610396     | AL   | L2/3  | full cleaning and partial axonal extension |
| 141   | 610403     | AL   | L2/3  | full cleaning and partial axonal extension |
| 142   | 610434     | AL   | L2/3  | full cleaning and partial axonal extension |
| 143   | 610535     | AL   | L2/3  | full cleaning and partial axonal extension |
| 144   | 610607     | AL   | L2/3  | full cleaning and partial axonal extension |
| 145   | 610615     | AL   | L2/3  | full cleaning and partial axonal extension |
| 146   | 612143     | AL   | L2/3  | full cleaning and partial axonal extension |
| 147   | 612266     | AL   | L2/3  | full cleaning and partial axonal extension |
| 148   | 612352     | AL   | L2/3  | full cleaning and partial axonal extension |

**Supplemental Table 2.** Pairwise comparison of the presynaptic mean in silico signal correlation between different neuron pair populations. For each comparison, a pairwise t-test was performed to test the null hypothesis that for each presynaptic neuron, the mean in silico signal correlation is the same between two postsynaptic populations. adjusted p-value is the adjusted p-value through the BH multicomparison correction procedure.

| Comparison               | Projection type | Mean pairwise difference | p-value  | adjusted p-value | t statistic | n  |
|--------------------------|-----------------|--------------------------|----------|------------------|-------------|----|
| ADP vs Same region       | HVA->HVA        | 0.015                    | 5.30e-05 | 7.96e-05         | 4.405       | 53 |
| ADP vs Same region       | HVA->V1         | 0.007                    | 1.14e-02 | 1.14e-02         | 2.661       | 39 |
| ADP vs Same region       | V1->HVA         | 0.011                    | 3.12e-03 | 3.41e-03         | 3.475       | 17 |
| ADP vs Same region       | V1->V1          | 0.009                    | 3.18e-05 | 5.45e-05         | 4.793       | 35 |
| Connected vs ADP         | HVA->HVA        | 0.026                    | 3.58e-08 | 2.15e-07         | 6.460       | 53 |
| Connected vs ADP         | HVA->V1         | 0.029                    | 7.85e-06 | 1.57e-05         | 5.168       | 39 |
| Connected vs ADP         | V1->HVA         | 0.023                    | 1.25e-03 | 1.50e-03         | 3.908       | 17 |
| Connected vs ADP         | V1->V1          | 0.030                    | 7.33e-06 | 1.57e-05         | 5.285       | 35 |
| Connected vs Same region | HVA->HVA        | 0.042                    | 3.37e-10 | 4.04e-09         | 7.733       | 53 |
| Connected vs Same region | HVA->V1         | 0.036                    | 5.77e-06 | 1.57e-05         | 5.266       | 39 |
| Connected vs Same region | V1->HVA         | 0.034                    | 9.21e-05 | 1.23e-04         | 5.175       | 17 |
| Connected vs Same region | V1->V1          | 0.039                    | 4.05e-07 | 1.62e-06         | 6.253       | 35 |

**Supplemental Table 3.** Number of neurons and neuron pairs involved in the visualization of the correlation between in silico signal correlation and  $L_d$  / neuron pair (synapses excluded) in different projection types across brain areas.

| Projection type | $\Delta$ in silico signal correlation bin | # of presynaptic neurons | # of postsynaptic neurons | # of ADP control neurons | # of same region control neurons | # of pre-post pairs | # of pre-ADP pairs | # of pre-'same region' pairs | # of synapses | total $L_d$ (mm) |
|-----------------|-------------------------------------------|--------------------------|---------------------------|--------------------------|----------------------------------|---------------------|--------------------|------------------------------|---------------|------------------|
| V1 → V1         | -0.30 - -0.20                             | 27                       | 0                         | 427                      | 27                               | 0                   | 570                | 1518                         | 0             | 14.618620        |
| V1 → V1         | -0.20 - -0.10                             | 36                       | 0                         | 3624                     | 36                               | 0                   | 8358               | 22716                        | 0             | 235.352922       |
| V1 → V1         | -0.10 - -0.00                             | 36                       | 0                         | 5939                     | 36                               | 0                   | 31843              | 82271                        | 0             | 943.324036       |
| V1 → V1         | -0.00 - 0.10                              | 36                       | 0                         | 5575                     | 36                               | 0                   | 22037              | 53619                        | 0             | 704.008419       |
| V1 → V1         | 0.10 - 0.20                               | 36                       | 0                         | 3884                     | 36                               | 0                   | 8136               | 18497                        | 0             | 268.080820       |
| V1 → V1         | 0.20 - 0.30                               | 36                       | 0                         | 1938                     | 36                               | 0                   | 2662               | 5310                         | 0             | 86.811831        |
| V1 → V1         | 0.30 - 0.40                               | 36                       | 0                         | 754                      | 36                               | 0                   | 862                | 1373                         | 0             | 29.303881        |
| V1 → V1         | 0.40 - 0.50                               | 34                       | 0                         | 245                      | 27                               | 0                   | 256                | 350                          | 0             | 8.436686         |
| HVA → HV A      | -0.30 - -0.20                             | 100                      | 0                         | 737                      | 98                               | 0                   | 2642               | 9566                         | 0             | 76.177507        |
| HVA → HV A      | -0.20 - -0.10                             | 102                      | 0                         | 2207                     | 102                              | 0                   | 13596              | 36699                        | 0             | 417.557033       |
| HVA → HV A      | -0.10 - -0.00                             | 102                      | 0                         | 2593                     | 102                              | 0                   | 29335              | 70079                        | 0             | 994.561220       |
| HVA → HV A      | -0.00 - 0.10                              | 102                      | 0                         | 2549                     | 102                              | 0                   | 24611              | 58614                        | 0             | 853.487712       |
| HVA → HV A      | 0.10 - 0.20                               | 102                      | 0                         | 2264                     | 102                              | 0                   | 13152              | 29881                        | 0             | 484.795597       |
| HVA → HV A      | 0.20 - 0.30                               | 102                      | 0                         | 1677                     | 102                              | 0                   | 5266               | 10534                        | 0             | 203.187307       |
| HVA → HV A      | 0.30 - 0.40                               | 102                      | 0                         | 828                      | 102                              | 0                   | 1469               | 2700                         | 0             | 57.001171        |
| V1 → HV A       | -0.20 - -0.10                             | 29                       | 0                         | 958                      | 29                               | 0                   | 1430               | 7995                         | 0             | 30.452029        |
| V1 → HV A       | -0.10 - -0.00                             | 29                       | 0                         | 2203                     | 29                               | 0                   | 5725               | 32680                        | 0             | 141.454788       |
| V1 → HV A       | -0.00 - 0.10                              | 29                       | 0                         | 2027                     | 29                               | 0                   | 4825               | 23561                        | 0             | 123.475999       |
| V1 → HV A       | 0.10 - 0.20                               | 29                       | 0                         | 1038                     | 29                               | 0                   | 1541               | 7314                         | 0             | 38.443692        |
| V1 → HV A       | 0.20 - 0.30                               | 29                       | 0                         | 348                      | 29                               | 0                   | 398                | 1794                         | 0             | 9.596663         |
| HVA → V1        | -0.30 - -0.20                             | 87                       | 0                         | 450                      | 87                               | 0                   | 731                | 8861                         | 0             | 13.161841        |
| HVA → V1        | -0.20 - -0.10                             | 92                       | 0                         | 2834                     | 92                               | 0                   | 6850               | 88153                        | 0             | 123.501498       |
| HVA → V1        | -0.10 - -0.00                             | 92                       | 0                         | 5315                     | 92                               | 0                   | 17932              | 245585                       | 0             | 345.186645       |
| HVA → V1        | -0.00 - 0.10                              | 92                       | 0                         | 4582                     | 92                               | 0                   | 13701              | 180600                       | 0             | 279.289998       |
| HVA → V1        | 0.10 - 0.20                               | 92                       | 0                         | 2753                     | 92                               | 0                   | 5823               | 70851                        | 0             | 119.710286       |
| HVA → V1        | 0.20 - 0.30                               | 92                       | 0                         | 1345                     | 92                               | 0                   | 2135               | 21317                        | 0             | 44.995031        |
| HVA → V1        | 0.30 - 0.40                               | 92                       | 0                         | 479                      | 92                               | 0                   | 616                | 5487                         | 0             | 13.275195        |

**Supplemental Table 4.** Number of neurons and neuron pairs involved in the visualization of the correlation between in silico signal correlation and  $N_{syn}/mm L_d$  in different projection types across brain areas.

| Projection type | $\Delta$ in silico signal correlation bin | # of presynaptic neurons | # of postsynaptic neurons | # of ADP control neurons | # of same region control neurons | # of pre-post pairs | # of pre-ADP pairs | # of pre-'same region' pairs | # of synapses | total $L_d$ (mm) |
|-----------------|-------------------------------------------|--------------------------|---------------------------|--------------------------|----------------------------------|---------------------|--------------------|------------------------------|---------------|------------------|
| V1 → V1         | -0.30 - -0.20                             | 25                       | 14                        | 519                      | 0                                | 14                  | 723                | 0                            | 15            | 18.799029        |
| V1 → V1         | -0.20 - -0.10                             | 36                       | 205                       | 3928                     | 0                                | 214                 | 9922               | 0                            | 232           | 283.947056       |
| V1 → V1         | -0.10 - -0.00                             | 36                       | 736                       | 5943                     | 0                                | 850                 | 33384              | 0                            | 945           | 1018.234754      |
| V1 → V1         | -0.00 - 0.10                              | 36                       | 664                       | 5534                     | 0                                | 767                 | 21646              | 0                            | 881           | 721.429779       |
| V1 → V1         | 0.10 - 0.20                               | 36                       | 305                       | 3713                     | 0                                | 337                 | 7791               | 0                            | 392           | 267.558394       |
| V1 → V1         | 0.20 - 0.30                               | 36                       | 135                       | 1817                     | 0                                | 145                 | 2574               | 0                            | 182           | 86.912818        |
| V1 → V1         | 0.30 - 0.40                               | 36                       | 46                        | 693                      | 0                                | 47                  | 823                | 0                            | 54            | 29.728849        |
| V1 → V1         | 0.40 - 0.50                               | 29                       | 27                        | 220                      | 0                                | 27                  | 256                | 0                            | 32            | 8.926083         |
| HVA → HVA       | -0.30 - -0.20                             | 92                       | 49                        | 830                      | 0                                | 52                  | 3241               | 0                            | 59            | 94.472855        |
| HVA → HVA       | -0.20 - -0.10                             | 99                       | 285                       | 2252                     | 0                                | 328                 | 14928              | 0                            | 359           | 481.976078       |
| HVA → HVA       | -0.10 - -0.00                             | 99                       | 624                       | 2596                     | 0                                | 778                 | 30495              | 0                            | 836           | 1077.808884      |
| HVA → HVA       | -0.00 - 0.10                              | 99                       | 584                       | 2538                     | 0                                | 755                 | 24558              | 0                            | 841           | 893.638912       |
| HVA → HVA       | 0.10 - 0.20                               | 99                       | 324                       | 2231                     | 0                                | 392                 | 12399              | 0                            | 440           | 472.381883       |
| HVA → HVA       | 0.20 - 0.30                               | 99                       | 160                       | 1590                     | 0                                | 169                 | 4537               | 0                            | 194           | 180.483568       |
| HVA → HVA       | 0.30 - 0.40                               | 95                       | 52                        | 714                      | 0                                | 54                  | 1168               | 0                            | 59            | 49.267130        |
| V1 → HVA        | -0.20 - -0.10                             | 28                       | 38                        | 1053                     | 0                                | 38                  | 1684               | 0                            | 39            | 37.691653        |
| V1 → HVA        | -0.10 - -0.00                             | 29                       | 187                       | 2231                     | 0                                | 200                 | 6180               | 0                            | 226           | 156.738585       |
| V1 → HVA        | -0.00 - 0.10                              | 29                       | 159                       | 1975                     | 0                                | 169                 | 4723               | 0                            | 194           | 126.623281       |
| V1 → HVA        | 0.10 - 0.20                               | 28                       | 76                        | 938                      | 0                                | 80                  | 1468               | 0                            | 94            | 38.089134        |
| V1 → HVA        | 0.20 - 0.30                               | 26                       | 24                        | 301                      | 0                                | 24                  | 368                | 0                            | 26            | 9.252531         |
| HVA → V1        | -0.30 - -0.20                             | 69                       | 13                        | 531                      | 0                                | 13                  | 879                | 0                            | 13            | 15.455242        |
| HVA → V1        | -0.20 - -0.10                             | 90                       | 133                       | 3029                     | 0                                | 138                 | 7559               | 0                            | 150           | 142.347339       |
| HVA → V1        | -0.10 - -0.00                             | 90                       | 364                       | 5363                     | 0                                | 385                 | 18588              | 0                            | 425           | 370.298550       |
| HVA → V1        | -0.00 - 0.10                              | 90                       | 327                       | 4534                     | 0                                | 349                 | 13530              | 0                            | 370           | 281.465665       |
| HVA → V1        | 0.10 - 0.20                               | 90                       | 142                       | 2648                     | 0                                | 146                 | 5607               | 0                            | 168           | 118.052918       |
| HVA → V1        | 0.20 - 0.30                               | 90                       | 67                        | 1257                     | 0                                | 70                  | 2008               | 0                            | 77            | 43.367913        |
| HVA → V1        | 0.30 - 0.40                               | 76                       | 25                        | 423                      | 0                                | 27                  | 559                | 0                            | 38            | 12.949679        |



**Supplemental Table 5.** Estimated marginal means of linear trends for the effect of in silico signal correlation on  $L_d$  / neuron pair (synapses excluded) in different projection types across brain areas. z and p-value are the z statistics and p-value of the marginal mean linear trends estimated from the fitted GLMMs. adjusted p-value is the adjusted p value through the BH multicomparison correction procedure.

| Projection type       | Coefficient | adjusted p-value | p-value   | # of presynaptic neurons | # of postsynaptic neurons | # of ADP control neurons | # of same region control neurons | # of synapses | # of pre-post pairs | # of pre-ADP pairs | # of pre-'same region' pairs |
|-----------------------|-------------|------------------|-----------|--------------------------|---------------------------|--------------------------|----------------------------------|---------------|---------------------|--------------------|------------------------------|
| $V1 \rightarrow V1$   | 1.125       | 5.18e-160        | 2.59e-160 | 36                       | 0                         | 6237                     | 36                               | 0             | 0                   | 74829              | 185807                       |
| $HVA \rightarrow HVA$ | 1.109       | 4.24e-278        | 1.06e-278 | 99                       | 0                         | 2635                     | 99                               | 0             | 0                   | 89611              | 212583                       |
| $V1 \rightarrow HVA$  | 1.101       | 5.36e-25         | 5.36e-25  | 29                       | 0                         | 2525                     | 29                               | 0             | 0                   | 14126              | 74633                        |
| $HVA \rightarrow V1$  | 0.872       | 1.48e-82         | 1.11e-82  | 90                       | 0                         | 6148                     | 90                               | 0             | 0                   | 47811              | 608388                       |

**Supplemental Table 6.** Estimated marginal means of linear trends for the effect of in silico signal correlation on  $N_{syn}/mm L_d$  in different projection types across brain areas. z and p-value are the z statistics and p-value of the marginal mean linear trends estimated from the fitted GLMMs. adjusted p-value is the adjusted p value through the BH multicomparison correction procedure.

| Projection type       | Coefficient | adjusted p-value | p-value  | # of presynaptic neurons | # of postsynaptic neurons | # of ADP control neurons | # of same region control neurons | # of synapses | # of pre-post pairs | # of pre-ADP pairs | # of pre-'same region' pairs |
|-----------------------|-------------|------------------|----------|--------------------------|---------------------------|--------------------------|----------------------------------|---------------|---------------------|--------------------|------------------------------|
| $V1 \rightarrow V1$   | 2.297       | 9.17e-50         | 2.29e-50 | 36                       | 1719                      | 6237                     | 0                                | 2744          | 2411                | 77240              | 0                            |
| $HVA \rightarrow HVA$ | 1.043       | 3.84e-12         | 2.88e-12 | 99                       | 1396                      | 2635                     | 0                                | 2803          | 2543                | 92154              | 0                            |
| $V1 \rightarrow HVA$  | 1.985       | 8.57e-07         | 8.57e-07 | 29                       | 448                       | 2525                     | 0                                | 584           | 515                 | 14641              | 0                            |
| $HVA \rightarrow V1$  | 1.603       | 2.59e-12         | 1.29e-12 | 90                       | 974                       | 6148                     | 0                                | 1255          | 1139                | 48950              | 0                            |

**Supplemental Table 7.** Number of neurons and neuron pairs involved in the visualization of the correlation between in vivo signal correlation and  $L_d$  / neuron pair (synapses excluded) in different projection types across brain areas.

| Projection type | $\Delta$ in vivo signal correlation bin | # of presynaptic neurons | # of postsynaptic neurons | # of ADP control neurons | # of same region control neurons | # of pre-post pairs | # of pre-ADP pairs | # of pre-'same region' pairs | # of synapses | total $L_d$ (mm) |
|-----------------|-----------------------------------------|--------------------------|---------------------------|--------------------------|----------------------------------|---------------------|--------------------|------------------------------|---------------|------------------|
| V1 → V1         | -0.30 - -0.20                           | 36                       | 0                         | 1552                     | 36                               | 0                   | 2656               | 9132                         | 0             | 69.390757        |
| V1 → V1         | -0.20 - -0.10                           | 36                       | 0                         | 5565                     | 36                               | 0                   | 19022              | 54877                        | 0             | 543.353655       |
| V1 → V1         | -0.10 - -0.00                           | 36                       | 0                         | 6114                     | 36                               | 0                   | 23976              | 60410                        | 0             | 728.386124       |
| V1 → V1         | -0.00 - 0.10                            | 36                       | 0                         | 5449                     | 36                               | 0                   | 15642              | 37077                        | 0             | 501.565276       |
| V1 → V1         | 0.10 - 0.20                             | 36                       | 0                         | 4178                     | 36                               | 0                   | 9062               | 20187                        | 0             | 296.744655       |
| V1 → V1         | 0.20 - 0.30                             | 36                       | 0                         | 2902                     | 36                               | 0                   | 4947               | 10613                        | 0             | 158.206795       |
| V1 → V1         | 0.30 - 0.40                             | 36                       | 0                         | 1800                     | 36                               | 0                   | 2584               | 5761                         | 0             | 82.535045        |
| V1 → V1         | 0.40 - 0.50                             | 36                       | 0                         | 1091                     | 36                               | 0                   | 1399               | 3143                         | 0             | 45.476341        |
| V1 → V1         | 0.50 - 0.60                             | 35                       | 0                         | 625                      | 35                               | 0                   | 768                | 1571                         | 0             | 24.006232        |
| V1 → V1         | 0.60 - 0.70                             | 31                       | 0                         | 317                      | 29                               | 0                   | 384                | 747                          | 0             | 12.507211        |
| HVA → HVA       | -0.40 - -0.30                           | 65                       | 0                         | 225                      | 64                               | 0                   | 446                | 1904                         | 0             | 11.872237        |
| HVA → HVA       | -0.30 - -0.20                           | 104                      | 0                         | 1212                     | 104                              | 0                   | 4695               | 15354                        | 0             | 141.825146       |
| HVA → HVA       | -0.20 - -0.10                           | 106                      | 0                         | 2805                     | 106                              | 0                   | 20166              | 54570                        | 0             | 653.240105       |
| HVA → HVA       | -0.10 - -0.00                           | 106                      | 0                         | 2972                     | 106                              | 0                   | 32117              | 79749                        | 0             | 1072.653987      |
| HVA → HVA       | -0.00 - 0.10                            | 106                      | 0                         | 2910                     | 106                              | 0                   | 22291              | 56261                        | 0             | 763.312753       |
| HVA → HVA       | 0.10 - 0.20                             | 106                      | 0                         | 2621                     | 106                              | 0                   | 12457              | 31246                        | 0             | 436.743130       |
| HVA → HVA       | 0.20 - 0.30                             | 106                      | 0                         | 2107                     | 106                              | 0                   | 6603               | 15249                        | 0             | 235.733457       |
| HVA → HVA       | 0.30 - 0.40                             | 106                      | 0                         | 1408                     | 106                              | 0                   | 3156               | 6797                         | 0             | 120.009172       |
| HVA → HVA       | 0.40 - 0.50                             | 106                      | 0                         | 842                      | 106                              | 0                   | 1479               | 2788                         | 0             | 57.110029        |
| HVA → HVA       | 0.50 - 0.60                             | 99                       | 0                         | 417                      | 95                               | 0                   | 575                | 977                          | 0             | 24.809982        |
| V1 → HVA        | -0.30 - -0.20                           | 29                       | 0                         | 381                      | 29                               | 0                   | 472                | 3237                         | 0             | 11.502273        |
| V1 → HVA        | -0.20 - -0.10                           | 29                       | 0                         | 1740                     | 29                               | 0                   | 3188               | 17931                        | 0             | 77.885536        |
| V1 → HVA        | -0.10 - -0.00                           | 29                       | 0                         | 2299                     | 29                               | 0                   | 5273               | 29111                        | 0             | 131.740088       |
| V1 → HVA        | -0.00 - 0.10                            | 29                       | 0                         | 1896                     | 29                               | 0                   | 3584               | 17887                        | 0             | 87.290731        |
| V1 → HVA        | 0.10 - 0.20                             | 29                       | 0                         | 1232                     | 29                               | 0                   | 1850               | 8793                         | 0             | 46.915050        |
| V1 → HVA        | 0.20 - 0.30                             | 29                       | 0                         | 706                      | 29                               | 0                   | 915                | 4306                         | 0             | 23.142961        |
| V1 → HVA        | 0.30 - 0.40                             | 29                       | 0                         | 376                      | 29                               | 0                   | 432                | 2088                         | 0             | 9.855496         |
| V1 → HVA        | 0.40 - 0.50                             | 29                       | 0                         | 212                      | 29                               | 0                   | 253                | 1004                         | 0             | 6.288603         |
| HVA → V1        | -0.30 - -0.20                           | 92                       | 0                         | 1188                     | 92                               | 0                   | 1960               | 24054                        | 0             | 34.934123        |
| HVA → V1        | -0.20 - -0.10                           | 94                       | 0                         | 4640                     | 94                               | 0                   | 12391              | 153177                       | 0             | 234.769489       |
| HVA → V1        | -0.10 - -0.00                           | 94                       | 0                         | 5673                     | 94                               | 0                   | 17333              | 227262                       | 0             | 341.230850       |
| HVA → V1        | -0.00 - 0.10                            | 94                       | 0                         | 4812                     | 94                               | 0                   | 11544              | 145012                       | 0             | 230.704006       |
| HVA → V1        | 0.10 - 0.20                             | 94                       | 0                         | 3291                     | 94                               | 0                   | 6244               | 75588                        | 0             | 127.891275       |
| HVA → V1        | 0.20 - 0.30                             | 94                       | 0                         | 1974                     | 94                               | 0                   | 3115               | 37057                        | 0             | 64.396003        |
| HVA → V1        | 0.30 - 0.40                             | 94                       | 0                         | 1167                     | 94                               | 0                   | 1611               | 17422                        | 0             | 31.785912        |
| HVA → V1        | 0.40 - 0.50                             | 94                       | 0                         | 578                      | 94                               | 0                   | 699                | 7804                         | 0             | 14.966269        |

**Supplemental Table 8.** Number of neurons and neuron pairs involved in the visualization of the correlation between in vivo signal correlation and  $N_{syn}/mm L_d$  in different projection types across brain areas.

| Projection type | $\Delta$ in vivo signal correlation bin | # of presynaptic neurons | # of postsynaptic neurons | # of ADP control neurons | # of same region control neurons | # of pre-post pairs | # of pre-ADP pairs | # of pre-'same region' pairs | # of synapses | total $L_d$ (mm) |
|-----------------|-----------------------------------------|--------------------------|---------------------------|--------------------------|----------------------------------|---------------------|--------------------|------------------------------|---------------|------------------|
| V1 → V1         | -0.30 - -0.20                           | 34                       | 101                       | 2202                     | 0                                | 104                 | 4393               | 0                            | 116           | 120.196380       |
| V1 → V1         | -0.20 - -0.10                           | 36                       | 483                       | 5747                     | 0                                | 520                 | 20983              | 0                            | 569           | 614.701246       |
| V1 → V1         | -0.10 - -0.00                           | 36                       | 588                       | 6111                     | 0                                | 657                 | 23822              | 0                            | 734           | 749.965351       |
| V1 → V1         | -0.00 - 0.10                            | 36                       | 477                       | 5353                     | 0                                | 525                 | 15389              | 0                            | 582           | 510.116138       |
| V1 → V1         | 0.10 - 0.20                             | 36                       | 299                       | 4038                     | 0                                | 327                 | 8806               | 0                            | 382           | 301.521896       |
| V1 → V1         | 0.20 - 0.30                             | 36                       | 205                       | 2774                     | 0                                | 223                 | 4735               | 0                            | 263           | 160.163966       |
| V1 → V1         | 0.30 - 0.40                             | 36                       | 111                       | 1665                     | 0                                | 112                 | 2461               | 0                            | 135           | 82.914655        |
| V1 → V1         | 0.40 - 0.50                             | 36                       | 64                        | 1006                     | 0                                | 66                  | 1325               | 0                            | 79            | 43.172834        |
| V1 → V1         | 0.50 - 0.60                             | 35                       | 29                        | 571                      | 0                                | 32                  | 723                | 0                            | 42            | 24.178848        |
| V1 → V1         | 0.60 - 0.70                             | 30                       | 21                        | 286                      | 0                                | 22                  | 367                | 0                            | 33            | 12.753262        |
| HVA → HVA       | -0.40 - -0.30                           | 50                       | 13                        | 332                      | 0                                | 13                  | 742                | 0                            | 15            | 20.548477        |
| HVA → HVA       | -0.30 - -0.20                           | 99                       | 87                        | 1393                     | 0                                | 93                  | 5788               | 0                            | 103           | 180.512305       |
| HVA → HVA       | -0.20 - -0.10                           | 105                      | 406                       | 2837                     | 0                                | 471                 | 21472              | 0                            | 509           | 716.812856       |
| HVA → HVA       | -0.10 - -0.00                           | 105                      | 688                       | 2969                     | 0                                | 872                 | 32905              | 0                            | 947           | 1142.705436      |
| HVA → HVA       | -0.00 - 0.10                            | 105                      | 552                       | 2911                     | 0                                | 661                 | 22349              | 0                            | 715           | 794.109314       |
| HVA → HVA       | 0.10 - 0.20                             | 105                      | 304                       | 2599                     | 0                                | 344                 | 12079              | 0                            | 391           | 435.790667       |
| HVA → HVA       | 0.20 - 0.30                             | 105                      | 173                       | 2058                     | 0                                | 188                 | 6251               | 0                            | 218           | 234.891093       |
| HVA → HVA       | 0.30 - 0.40                             | 105                      | 104                       | 1345                     | 0                                | 109                 | 2938               | 0                            | 126           | 117.834260       |
| HVA → HVA       | 0.40 - 0.50                             | 101                      | 46                        | 781                      | 0                                | 48                  | 1315               | 0                            | 51            | 51.536756        |
| HVA → HVA       | 0.50 - 0.60                             | 83                       | 20                        | 376                      | 0                                | 20                  | 519                | 0                            | 24            | 23.481751        |
| V1 → HVA        | -0.30 - -0.20                           | 24                       | 18                        | 450                      | 0                                | 18                  | 593                | 0                            | 21            | 14.369431        |
| V1 → HVA        | -0.20 - -0.10                           | 29                       | 117                       | 1875                     | 0                                | 123                 | 3741               | 0                            | 140           | 95.546797        |
| V1 → HVA        | -0.10 - -0.00                           | 29                       | 168                       | 2317                     | 0                                | 175                 | 5532               | 0                            | 196           | 141.870319       |
| V1 → HVA        | -0.00 - 0.10                            | 29                       | 121                       | 1822                     | 0                                | 125                 | 3417               | 0                            | 140           | 86.935079        |
| V1 → HVA        | 0.10 - 0.20                             | 29                       | 69                        | 1139                     | 0                                | 71                  | 1715               | 0                            | 78            | 44.698868        |
| V1 → HVA        | 0.20 - 0.30                             | 26                       | 44                        | 661                      | 0                                | 44                  | 889                | 0                            | 50            | 23.830929        |
| V1 → HVA        | 0.30 - 0.40                             | 27                       | 25                        | 358                      | 0                                | 26                  | 449                | 0                            | 31            | 10.845062        |
| V1 → HVA        | 0.40 - 0.50                             | 25                       | 11                        | 195                      | 0                                | 11                  | 237                | 0                            | 13            | 6.017091         |
| HVA → V1        | -0.30 - -0.20                           | 85                       | 46                        | 1263                     | 0                                | 46                  | 2180               | 0                            | 50            | 40.028150        |
| HVA → V1        | -0.20 - -0.10                           | 93                       | 211                       | 4711                     | 0                                | 220                 | 12816              | 0                            | 242           | 248.419138       |
| HVA → V1        | -0.10 - -0.00                           | 93                       | 375                       | 5690                     | 0                                | 400                 | 17857              | 0                            | 434           | 361.524099       |
| HVA → V1        | -0.00 - 0.10                            | 93                       | 291                       | 4804                     | 0                                | 305                 | 11709              | 0                            | 333           | 241.200378       |
| HVA → V1        | 0.10 - 0.20                             | 93                       | 159                       | 3250                     | 0                                | 164                 | 6214               | 0                            | 181           | 129.824307       |
| HVA → V1        | 0.20 - 0.30                             | 93                       | 96                        | 1933                     | 0                                | 98                  | 3084               | 0                            | 116           | 65.574084        |
| HVA → V1        | 0.30 - 0.40                             | 91                       | 44                        | 1119                     | 0                                | 45                  | 1531               | 0                            | 49            | 31.773139        |
| HVA → V1        | 0.40 - 0.50                             | 82                       | 30                        | 549                      | 0                                | 30                  | 689                | 0                            | 33            | 15.452123        |

**Supplemental Table 9.** Estimated marginal means of linear trends for the effect of in vivo signal correlation on  $L_d$  / neuron pair (synapses excluded) in different projection types across brain areas. z and p-value are the z statistics and p-value of the marginal mean linear trends estimated from the fitted GLMMs. adjusted p-value is the adjusted p value through the BH multicomparison correction procedure.

| Projection type | Coefficient | adjusted p-value | p-value   | # of presynaptic neurons | # of postsynaptic neurons | # of ADP control neurons | # of same region control neurons | # of synapses | # of pre-post pairs | # of pre-ADP pairs | # of pre-'same region' pairs |
|-----------------|-------------|------------------|-----------|--------------------------|---------------------------|--------------------------|----------------------------------|---------------|---------------------|--------------------|------------------------------|
| V1 → V1         | 0.779       | 1.96e-210        | 4.89e-211 | 36                       | 0                         | 6807                     | 36                               | 0             | 0                   | 80703              | 204150                       |
| HVA → HVA       | 0.698       | 3.51e-198        | 1.75e-198 | 105                      | 0                         | 3010                     | 105                              | 0             | 0                   | 103839             | 262309                       |
| V1 → HVA        | 0.624       | 1.60e-23         | 1.60e-23  | 29                       | 0                         | 2887                     | 29                               | 0             | 0                   | 16164              | 85137                        |
| HVA → V1        | 0.428       | 5.69e-43         | 4.27e-43  | 93                       | 0                         | 6720                     | 93                               | 0             | 0                   | 55313              | 685610                       |



**Supplemental Table 10.** Estimated marginal means of linear trends for the effect of in vivo signal correlation on  $N_{syn}/mm L_d$  in different projection types across brain areas. z and p-value are the z statistics and p-value of the marginal mean linear trends estimated from the fitted GLMMs. adjusted p-value is the adjusted p value through the BH multicomparison correction procedure.

| Projection type       | Coefficient | adjusted p-value | p-value  | # of presynaptic neurons | # of postsynaptic neurons | # of ADP control neurons | # of same region control neurons | # of synapses | # of pre-post pairs | # of pre-ADP pairs | # of pre-'same region' pairs |
|-----------------------|-------------|------------------|----------|--------------------------|---------------------------|--------------------------|----------------------------------|---------------|---------------------|--------------------|------------------------------|
| $V1 \rightarrow V1$   | 1.126       | 3.66e-30         | 9.16e-31 | 36                       | 1865                      | 6807                     | 0                                | 2947          | 2600                | 83303              | 0                            |
| $HVA \rightarrow HVA$ | 0.667       | 1.96e-09         | 9.79e-10 | 105                      | 1566                      | 3010                     | 0                                | 3114          | 2832                | 106671             | 0                            |
| $V1 \rightarrow HVA$  | 0.857       | 1.63e-04         | 1.63e-04 | 29                       | 522                       | 2887                     | 0                                | 679           | 602                 | 16766              | 0                            |
| $HVA \rightarrow V1$  | 0.861       | 9.53e-08         | 7.15e-08 | 93                       | 1116                      | 6720                     | 0                                | 1445          | 1315                | 56628              | 0                            |

**Supplemental Table 11.** Number of neurons and neuron pairs involved in the visualization of the correlation between feature weight similarity and  $L_d$  / neuron pair (synapses excluded) in different projection types across brain areas.

| Projection type | $\Delta$ feature weight similarity bin | # of presynaptic neurons | # of postsynaptic neurons | # of ADP control neurons | # of same region control neurons | # of pre-post pairs | # of pre-ADP pairs | # of pre-'same region' pairs | # of synapses | total $L_d$ (mm) |
|-----------------|----------------------------------------|--------------------------|---------------------------|--------------------------|----------------------------------|---------------------|--------------------|------------------------------|---------------|------------------|
| V1 → V1         | -0.30 - -0.20                          | 36                       | 0                         | 1072                     | 36                               | 0                   | 1295               | 3229                         | 0             | 36.335238        |
| V1 → V1         | -0.20 - -0.10                          | 36                       | 0                         | 4396                     | 36                               | 0                   | 9834               | 25779                        | 0             | 285.168739       |
| V1 → V1         | -0.10 - 0.00                           | 36                       | 0                         | 5808                     | 36                               | 0                   | 25602              | 67324                        | 0             | 768.876584       |
| V1 → V1         | 0.00 - 0.10                            | 36                       | 0                         | 5735                     | 36                               | 0                   | 25230              | 62013                        | 0             | 783.990533       |
| V1 → V1         | 0.10 - 0.20                            | 36                       | 0                         | 4410                     | 36                               | 0                   | 10333              | 22756                        | 0             | 335.696665       |
| V1 → V1         | 0.20 - 0.30                            | 36                       | 0                         | 1629                     | 36                               | 0                   | 2112               | 4129                         | 0             | 69.293019        |
| V1 → V1         | 0.30 - 0.40                            | 36                       | 0                         | 301                      | 35                               | 0                   | 318                | 436                          | 0             | 10.072933        |
| HVA → HVA       | -0.30 - -0.20                          | 102                      | 0                         | 815                      | 102                              | 0                   | 1392               | 4489                         | 0             | 41.334690        |
| HVA → HVA       | -0.20 - -0.10                          | 102                      | 0                         | 2359                     | 102                              | 0                   | 10985              | 31232                        | 0             | 335.521478       |
| HVA → HVA       | -0.10 - 0.00                           | 102                      | 0                         | 2619                     | 102                              | 0                   | 30066              | 78862                        | 0             | 988.398935       |
| HVA → HVA       | 0.00 - 0.10                            | 102                      | 0                         | 2600                     | 102                              | 0                   | 31946              | 74147                        | 0             | 1124.617864      |
| HVA → HVA       | 0.10 - 0.20                            | 102                      | 0                         | 2358                     | 102                              | 0                   | 13356              | 27119                        | 0             | 493.620990       |
| HVA → HVA       | 0.20 - 0.30                            | 102                      | 0                         | 1339                     | 102                              | 0                   | 2686               | 4189                         | 0             | 109.398149       |
| HVA → HVA       | 0.30 - 0.40                            | 90                       | 0                         | 250                      | 76                               | 0                   | 289                | 358                          | 0             | 14.959203        |
| V1 → HVA        | -0.20 - -0.10                          | 29                       | 0                         | 1136                     | 29                               | 0                   | 1620               | 8739                         | 0             | 40.188636        |
| V1 → HVA        | -0.10 - 0.00                           | 29                       | 0                         | 2146                     | 29                               | 0                   | 5204               | 28801                        | 0             | 128.424763       |
| V1 → HVA        | 0.00 - 0.10                            | 29                       | 0                         | 2122                     | 29                               | 0                   | 5175               | 26929                        | 0             | 126.070146       |
| V1 → HVA        | 0.10 - 0.20                            | 29                       | 0                         | 1134                     | 29                               | 0                   | 1729               | 8279                         | 0             | 43.275205        |
| V1 → HVA        | 0.20 - 0.30                            | 29                       | 0                         | 224                      | 29                               | 0                   | 248                | 1072                         | 0             | 6.141092         |
| HVA → V1        | -0.20 - -0.10                          | 92                       | 0                         | 3143                     | 92                               | 0                   | 5593               | 78638                        | 0             | 104.073655       |
| HVA → V1        | -0.10 - 0.00                           | 92                       | 0                         | 5364                     | 92                               | 0                   | 17167              | 231272                       | 0             | 327.750993       |
| HVA → V1        | 0.00 - 0.10                            | 92                       | 0                         | 5214                     | 92                               | 0                   | 17054              | 220016                       | 0             | 341.745469       |
| HVA → V1        | 0.10 - 0.20                            | 92                       | 0                         | 3111                     | 92                               | 0                   | 6369               | 73731                        | 0             | 132.250047       |
| HVA → V1        | 0.20 - 0.30                            | 92                       | 0                         | 846                      | 92                               | 0                   | 1111               | 10568                        | 0             | 24.540542        |

**Supplemental Table 12.** Number of neurons and neuron pairs involved in the visualization of the correlation between feature weight similarity and  $N_{syn}/mm$   $L_d$  in different projection types across brain areas.

| Projection type | $\Delta$ feature weight similarity bin | # of presynaptic neurons | # of postsynaptic neurons | # of ADP control neurons | # of same region control neurons | # of pre-post pairs | # of pre-ADP pairs | # of pre-'same region' pairs | # of synapses | total $L_d$ (mm) |
|-----------------|----------------------------------------|--------------------------|---------------------------|--------------------------|----------------------------------|---------------------|--------------------|------------------------------|---------------|------------------|
| V1 → V1         | -0.30 - -0.20                          | 36                       | 36                        | 1182                     | 0                                | 36                  | 1509               | 0                            | 38            | 43.620452        |
| V1 → V1         | -0.20 - -0.10                          | 36                       | 230                       | 4537                     | 0                                | 237                 | 10895              | 0                            | 258           | 322.934569       |
| V1 → V1         | -0.10 - 0.00                           | 36                       | 630                       | 5812                     | 0                                | 708                 | 27056              | 0                            | 794           | 833.029064       |
| V1 → V1         | 0.00 - 0.10                            | 36                       | 729                       | 5720                     | 0                                | 852                 | 25425              | 0                            | 969           | 819.256558       |
| V1 → V1         | 0.10 - 0.20                            | 36                       | 388                       | 4292                     | 0                                | 438                 | 9940               | 0                            | 509           | 337.394190       |
| V1 → V1         | 0.20 - 0.30                            | 36                       | 102                       | 1496                     | 0                                | 112                 | 2007               | 0                            | 139           | 69.123548        |
| V1 → V1         | 0.30 - 0.40                            | 33                       | 24                        | 259                      | 0                                | 24                  | 294                | 0                            | 31            | 10.411849        |
| HVA → HVA       | -0.30 - -0.20                          | 99                       | 33                        | 968                      | 0                                | 35                  | 1852               | 0                            | 37            | 55.775849        |
| HVA → HVA       | -0.20 - -0.10                          | 99                       | 254                       | 2421                     | 0                                | 276                 | 12617              | 0                            | 301           | 398.118425       |
| HVA → HVA       | -0.10 - 0.00                           | 99                       | 663                       | 2619                     | 0                                | 807                 | 32094              | 0                            | 876           | 1097.132235      |
| HVA → HVA       | 0.00 - 0.10                            | 99                       | 649                       | 2594                     | 0                                | 847                 | 31140              | 0                            | 926           | 1149.553761      |
| HVA → HVA       | 0.10 - 0.20                            | 99                       | 386                       | 2318                     | 0                                | 450                 | 11911              | 0                            | 514           | 461.647156       |
| HVA → HVA       | 0.20 - 0.30                            | 98                       | 104                       | 1189                     | 0                                | 109                 | 2216               | 0                            | 128           | 98.577172        |
| HVA → HVA       | 0.30 - 0.40                            | 71                       | 15                        | 183                      | 0                                | 15                  | 213                | 0                            | 16            | 11.813672        |
| V1 → HVA        | -0.20 - -0.10                          | 28                       | 45                        | 1187                     | 0                                | 47                  | 1799               | 0                            | 50            | 45.872386        |
| V1 → HVA        | -0.10 - 0.00                           | 29                       | 174                       | 2162                     | 0                                | 179                 | 5474               | 0                            | 196           | 139.731979       |
| V1 → HVA        | 0.00 - 0.10                            | 29                       | 196                       | 2103                     | 0                                | 204                 | 5296               | 0                            | 242           | 132.939401       |
| V1 → HVA        | 0.10 - 0.20                            | 29                       | 67                        | 1102                     | 0                                | 70                  | 1684               | 0                            | 80            | 44.564126        |
| V1 → HVA        | 0.20 - 0.30                            | 27                       | 13                        | 196                      | 0                                | 13                  | 227                | 0                            | 14            | 5.948031         |
| HVA → V1        | -0.20 - -0.10                          | 90                       | 106                       | 3354                     | 0                                | 109                 | 6261               | 0                            | 121           | 120.205383       |
| HVA → V1        | -0.10 - 0.00                           | 90                       | 370                       | 5397                     | 0                                | 389                 | 18035              | 0                            | 429           | 355.383651       |
| HVA → V1        | 0.00 - 0.10                            | 90                       | 365                       | 5192                     | 0                                | 396                 | 16927              | 0                            | 425           | 348.693858       |
| HVA → V1        | 0.10 - 0.20                            | 90                       | 187                       | 2962                     | 0                                | 195                 | 5992               | 0                            | 218           | 128.408223       |
| HVA → V1        | 0.20 - 0.30                            | 84                       | 34                        | 709                      | 0                                | 36                  | 941                | 0                            | 45            | 20.898991        |

**Supplemental Table 13.** Estimated marginal means of linear trends for the effect of feature weight similarity on  $L_d$  / neuron pair (synapses excluded) in different projection types across brain areas. z and p-value are the z statistics and p-value of the marginal mean linear trends estimated from the fitted GLMMs. adjusted p-value is the adjusted p value through the BH multicomparison correction procedure.

| Projection type       | Coefficient | adjusted p-value | p-value   | # of presynaptic neurons | # of postsynaptic neurons | # of ADP control neurons | # of same region control neurons | # of synapses | # of pre-post pairs | # of pre-ADP pairs | # of pre-'same region' pairs |
|-----------------------|-------------|------------------|-----------|--------------------------|---------------------------|--------------------------|----------------------------------|---------------|---------------------|--------------------|------------------------------|
| $V1 \rightarrow V1$   | 0.947       | 3.48e-107        | 1.74e-107 | 36                       | 0                         | 6237                     | 36                               | 0             | 0                   | 74829              | 185807                       |
| $HVA \rightarrow HVA$ | 1.702       | 0.00e+00         | 0.00e+00  | 99                       | 0                         | 2635                     | 99                               | 0             | 0                   | 89611              | 212583                       |
| $V1 \rightarrow HVA$  | 0.701       | 5.01e-10         | 5.01e-10  | 29                       | 0                         | 2525                     | 29                               | 0             | 0                   | 14126              | 74633                        |
| $HVA \rightarrow V1$  | 1.109       | 3.18e-94         | 2.39e-94  | 90                       | 0                         | 6148                     | 90                               | 0             | 0                   | 47811              | 608388                       |

**Supplemental Table 14.** Estimated marginal means of linear trends for the effect of feature weight similarity on  $N_{syn}/mm L_d$  in different projection types across brain areas. z and p-value are the z statistics and p-value of the marginal mean linear trends estimated from the fitted GLMMs. adjusted p-value is the adjusted p value through the BH multicomparison correction procedure.

| Projection type       | Coefficient | adjusted p-value | p-value  | # of presynaptic neurons | # of postsynaptic neurons | # of ADP control neurons | # of same region control neurons | # of synapses | # of pre-post pairs | # of pre-ADP pairs | # of pre-'same region' pairs |
|-----------------------|-------------|------------------|----------|--------------------------|---------------------------|--------------------------|----------------------------------|---------------|---------------------|--------------------|------------------------------|
| $V1 \rightarrow V1$   | 2.216       | 2.45e-35         | 6.12e-36 | 36                       | 1719                      | 6237                     | 0                                | 2744          | 2411                | 77240              | 0                            |
| $HVA \rightarrow HVA$ | 1.398       | 1.13e-13         | 5.64e-14 | 99                       | 1396                      | 2635                     | 0                                | 2803          | 2543                | 92154              | 0                            |
| $V1 \rightarrow HVA$  | 1.754       | 9.51e-05         | 9.51e-05 | 29                       | 448                       | 2525                     | 0                                | 584           | 515                 | 14641              | 0                            |
| $HVA \rightarrow V1$  | 1.948       | 1.49e-11         | 1.11e-11 | 90                       | 974                       | 6148                     | 0                                | 1255          | 1139                | 48950              | 0                            |



**Supplemental Table 15.** Number of neurons and neuron pairs involved in the visualization of the correlation between receptive field center distance and  $L_d$  / neuron pair (synapses excluded) in different projection types across brain areas.

| Projection type | $\Delta$ receptive field center distance bin | # of presynaptic neurons | # of postsynaptic neurons | # of ADP control neurons | # of same region control neurons | # of pre-post pairs | # of pre-ADP pairs | # of pre-'same region' pairs | # of synapses | total $L_d$ (mm) |
|-----------------|----------------------------------------------|--------------------------|---------------------------|--------------------------|----------------------------------|---------------------|--------------------|------------------------------|---------------|------------------|
| V1 → V1         | -10.55 - -5.28                               | 36                       | 0                         | 3587                     | 36                               | 0                   | 13098              | 16616                        | 0             | 504.444179       |
| V1 → V1         | -5.28 - 0.00                                 | 36                       | 0                         | 5491                     | 36                               | 0                   | 36890              | 71763                        | 0             | 1189.389824      |
| V1 → V1         | 0.00 - 5.28                                  | 36                       | 0                         | 5010                     | 36                               | 0                   | 19930              | 68768                        | 0             | 498.660138       |
| V1 → V1         | 5.28 - 10.55                                 | 36                       | 0                         | 1599                     | 36                               | 0                   | 4266               | 24166                        | 0             | 86.320064        |
| V1 → V1         | 10.55 - 15.83                                | 36                       | 0                         | 211                      | 36                               | 0                   | 538                | 4188                         | 0             | 9.094726         |
| HVA → HVA       | -15.83 - -10.55                              | 44                       | 0                         | 513                      | 44                               | 0                   | 1213               | 1456                         | 0             | 53.734766        |
| HVA → HVA       | -10.55 - -5.28                               | 102                      | 0                         | 2281                     | 102                              | 0                   | 17614              | 26718                        | 0             | 723.876676       |
| HVA → HVA       | -5.28 - 0.00                                 | 102                      | 0                         | 2555                     | 102                              | 0                   | 37564              | 77929                        | 0             | 1331.043600      |
| HVA → HVA       | 0.00 - 5.28                                  | 102                      | 0                         | 2449                     | 102                              | 0                   | 25371              | 76129                        | 0             | 770.831112       |
| HVA → HVA       | 5.28 - 10.55                                 | 102                      | 0                         | 1177                     | 102                              | 0                   | 7797               | 32087                        | 0             | 202.978877       |
| HVA → HVA       | 10.55 - 15.83                                | 102                      | 0                         | 254                      | 102                              | 0                   | 1139               | 5848                         | 0             | 25.291692        |
| V1 → HVA        | -10.55 - -5.28                               | 29                       | 0                         | 985                      | 29                               | 0                   | 2253               | 11576                        | 0             | 58.076011        |
| V1 → HVA        | -5.28 - 0.00                                 | 29                       | 0                         | 1835                     | 29                               | 0                   | 5668               | 26875                        | 0             | 146.551732       |
| V1 → HVA        | 0.00 - 5.28                                  | 29                       | 0                         | 1623                     | 29                               | 0                   | 4369               | 23177                        | 0             | 104.541012       |
| V1 → HVA        | 5.28 - 10.55                                 | 29                       | 0                         | 620                      | 29                               | 0                   | 1562               | 10214                        | 0             | 33.327909        |
| HVA → V1        | -10.55 - -5.28                               | 92                       | 0                         | 3503                     | 92                               | 0                   | 5944               | 68076                        | 0             | 127.650382       |
| HVA → V1        | -5.28 - 0.00                                 | 92                       | 0                         | 5412                     | 92                               | 0                   | 20967              | 251016                       | 0             | 422.868388       |
| HVA → V1        | 0.00 - 5.28                                  | 92                       | 0                         | 4764                     | 92                               | 0                   | 15792              | 226867                       | 0             | 297.769153       |
| HVA → V1        | 5.28 - 10.55                                 | 92                       | 0                         | 1734                     | 92                               | 0                   | 4574               | 68340                        | 0             | 82.355277        |

**Supplemental Table 16.** Number of neurons and neuron pairs involved in the visualization of the correlation between receptive field center distance and  $N_{syn}/mm L_d$  in different projection types across brain areas.

| Projection type | $\Delta$ receptive field center distance bin | # of presynaptic neurons | # of postsynaptic neurons | # of ADP control neurons | # of same region control neurons | # of pre-post pairs | # of pre-ADP pairs | # of pre-'same region' pairs | # of synapses | total $L_d$ (mm) |
|-----------------|----------------------------------------------|--------------------------|---------------------------|--------------------------|----------------------------------|---------------------|--------------------|------------------------------|---------------|------------------|
| V1 → V1         | -10.55 - -5.28                               | 35                       | 168                       | 2274                     | 0                                | 178                 | 5317               | 0                            | 194           | 210.846986       |
| V1 → V1         | -5.28 - 0.00                                 | 36                       | 909                       | 5290                     | 0                                | 1202                | 36735              | 0                            | 1380          | 1313.420605      |
| V1 → V1         | 0.00 - 5.28                                  | 36                       | 695                       | 5647                     | 0                                | 811                 | 27327              | 0                            | 929           | 753.483234       |
| V1 → V1         | 5.28 - 10.55                                 | 36                       | 173                       | 2336                     | 0                                | 186                 | 6783               | 0                            | 204           | 142.873189       |
| V1 → V1         | 10.55 - 15.83                                | 34                       | 30                        | 406                      | 0                                | 32                  | 1006               | 0                            | 35            | 18.160384        |
| HVA → HVA       | -15.83 - -10.55                              | 28                       | 10                        | 243                      | 0                                | 11                  | 416                | 0                            | 14            | 17.918761        |
| HVA → HVA       | -10.55 - -5.28                               | 99                       | 321                       | 2096                     | 0                                | 378                 | 11349              | 0                            | 428           | 500.622918       |
| HVA → HVA       | -5.28 - 0.00                                 | 99                       | 774                       | 2530                     | 0                                | 1107                | 37168              | 0                            | 1220          | 1438.852620      |
| HVA → HVA       | 0.00 - 5.28                                  | 99                       | 609                       | 2581                     | 0                                | 756                 | 30304              | 0                            | 827           | 980.251453       |
| HVA → HVA       | 5.28 - 10.55                                 | 99                       | 199                       | 1584                     | 0                                | 246                 | 10984              | 0                            | 267           | 294.805748       |
| HVA → HVA       | 10.55 - 15.83                                | 99                       | 39                        | 384                      | 0                                | 43                  | 1765               | 0                            | 45            | 39.990970        |
| V1 → HVA        | -10.55 - -5.28                               | 27                       | 58                        | 819                      | 0                                | 61                  | 1816               | 0                            | 66            | 47.293930        |
| V1 → HVA        | -5.28 - 0.00                                 | 29                       | 203                       | 1796                     | 0                                | 228                 | 5917               | 0                            | 263           | 157.158156       |
| V1 → HVA        | 0.00 - 5.28                                  | 29                       | 153                       | 1809                     | 0                                | 158                 | 4861               | 0                            | 181           | 123.251450       |
| V1 → HVA        | 5.28 - 10.55                                 | 29                       | 58                        | 754                      | 0                                | 62                  | 1775               | 0                            | 67            | 40.294284        |
| HVA → V1        | -10.55 - -5.28                               | 86                       | 92                        | 2385                     | 0                                | 93                  | 3677               | 0                            | 106           | 73.522190        |
| HVA → V1        | -5.28 - 0.00                                 | 90                       | 494                       | 5289                     | 0                                | 535                 | 21967              | 0                            | 584           | 458.510473       |
| HVA → V1        | 0.00 - 5.28                                  | 90                       | 382                       | 5185                     | 0                                | 416                 | 18503              | 0                            | 467           | 368.061118       |
| HVA → V1        | 5.28 - 10.55                                 | 90                       | 85                        | 1770                     | 0                                | 89                  | 4319               | 0                            | 91            | 80.279113        |

**Supplemental Table 17.** Estimated marginal means of linear trends for the effect of receptive field center distance on  $L_d$  / neuron pair (synapses excluded) in different projection types across brain areas. z and p-value are the z statistics and p-value of the marginal mean linear trends estimated from the fitted GLMMs. adjusted p-value is the adjusted p value through the BH multicomparison correction procedure.

| Projection type | Coefficient | adjusted p-value | p-value   | # of presynaptic neurons | # of postsynaptic neurons | # of ADP control neurons | # of same region control neurons | # of synapses | # of pre-post pairs | # of pre-ADP pairs | # of pre-'same region' pairs |
|-----------------|-------------|------------------|-----------|--------------------------|---------------------------|--------------------------|----------------------------------|---------------|---------------------|--------------------|------------------------------|
| V1 → V1         | -0.127      | 0.00e+00         | 0.00e+00  | 36                       | 0                         | 6237                     | 36                               | 0             | 0                   | 74829              | 185807                       |
| HVA → HVA       | -0.080      | 0.00e+00         | 0.00e+00  | 99                       | 0                         | 2635                     | 99                               | 0             | 0                   | 89611              | 212583                       |
| V1 → HVA        | -0.022      | 1.01e-27         | 1.01e-27  | 29                       | 0                         | 2525                     | 29                               | 0             | 0                   | 14126              | 74633                        |
| HVA → V1        | -0.027      | 8.19e-119        | 6.14e-119 | 90                       | 0                         | 6148                     | 90                               | 0             | 0                   | 47811              | 608388                       |

**Supplemental Table 18.** Estimated marginal means of linear trends for the effect of receptive field center distance on  $N_{syn}/mm L_d$  in different projection types across brain areas. z and p-value are the z statistics and p-value of the marginal mean linear trends estimated from the fitted GLMMs. adjusted p-value is the adjusted p value through the BH multicomparison correction procedure.

| Projection type       | Coefficient | adjusted p-value | p-value  | # of presynaptic neurons | # of postsynaptic neurons | # of ADP control neurons | # of same region control neurons | # of synapses | # of pre-post pairs | # of pre-ADP pairs | # of pre-'same region' pairs |
|-----------------------|-------------|------------------|----------|--------------------------|---------------------------|--------------------------|----------------------------------|---------------|---------------------|--------------------|------------------------------|
| $V1 \rightarrow V1$   | 0.030       | 1.89e-09         | 4.72e-10 | 36                       | 1719                      | 6237                     | 0                                | 2744          | 2411                | 77240              | 0                            |
| $HVA \rightarrow HVA$ | 0.010       | 1.54e-02         | 1.15e-02 | 99                       | 1396                      | 2635                     | 0                                | 2803          | 2543                | 92154              | 0                            |
| $V1 \rightarrow HVA$  | -0.002      | 8.34e-01         | 8.34e-01 | 29                       | 448                       | 2525                     | 0                                | 584           | 515                 | 14641              | 0                            |
| $HVA \rightarrow V1$  | -0.018      | 1.54e-02         | 9.65e-03 | 90                       | 974                       | 6148                     | 0                                | 1255          | 1139                | 48950              | 0                            |

**Supplemental Table 19.** Number of neurons and neuron pairs involved in the visualization of the correlation between in silico  $\Delta Ori$  and  $L_d$  / neuron pair (synapses excluded) in different projection types across brain areas.

| Projection type       | $\Delta$ in silico $\Delta Ori$ bin | # of presynaptic neurons | # of postsynaptic neurons | # of ADP control neurons | # of same region control neurons | # of pre-post pairs | # of pre-ADP pairs | # of pre-'same region' pairs | # of synapses | total $L_d$ (mm) |
|-----------------------|-------------------------------------|--------------------------|---------------------------|--------------------------|----------------------------------|---------------------|--------------------|------------------------------|---------------|------------------|
| V1 $\rightarrow$ V1   | -57.16 - -28.58                     | 24                       | 0                         | 2307                     | 24                               | 0                   | 5415               | 15129                        | 0             | 171.067847       |
| V1 $\rightarrow$ V1   | -28.58 - 0.00                       | 24                       | 0                         | 2537                     | 24                               | 0                   | 8817               | 21968                        | 0             | 295.986023       |
| V1 $\rightarrow$ V1   | 0.00 - 28.58                        | 24                       | 0                         | 2743                     | 24                               | 0                   | 7084               | 17610                        | 0             | 221.974391       |
| V1 $\rightarrow$ V1   | 28.58 - 57.16                       | 24                       | 0                         | 2059                     | 24                               | 0                   | 5518               | 16021                        | 0             | 162.495971       |
| HVA $\rightarrow$ HVA | -57.16 - -28.58                     | 60                       | 0                         | 1125                     | 60                               | 0                   | 5729               | 13469                        | 0             | 194.286636       |
| HVA $\rightarrow$ HVA | -28.58 - 0.00                       | 60                       | 0                         | 1175                     | 60                               | 0                   | 6887               | 15960                        | 0             | 235.669897       |
| HVA $\rightarrow$ HVA | 0.00 - 28.58                        | 60                       | 0                         | 1179                     | 60                               | 0                   | 6905               | 16323                        | 0             | 231.975979       |
| HVA $\rightarrow$ HVA | 28.58 - 57.16                       | 60                       | 0                         | 1129                     | 60                               | 0                   | 5634               | 13479                        | 0             | 185.273829       |
| V1 $\rightarrow$ HVA  | -57.16 - -28.58                     | 18                       | 0                         | 502                      | 18                               | 0                   | 1017               | 4946                         | 0             | 26.483564        |
| V1 $\rightarrow$ HVA  | -28.58 - 0.00                       | 18                       | 0                         | 663                      | 18                               | 0                   | 1232               | 5295                         | 0             | 35.218815        |
| V1 $\rightarrow$ HVA  | 0.00 - 28.58                        | 18                       | 0                         | 654                      | 18                               | 0                   | 1179               | 5792                         | 0             | 31.287205        |
| V1 $\rightarrow$ HVA  | 28.58 - 57.16                       | 18                       | 0                         | 463                      | 18                               | 0                   | 797                | 5100                         | 0             | 20.293288        |
| HVA $\rightarrow$ V1  | -57.16 - -28.58                     | 53                       | 0                         | 1937                     | 53                               | 0                   | 3351               | 41162                        | 0             | 66.825000        |
| HVA $\rightarrow$ V1  | -28.58 - 0.00                       | 53                       | 0                         | 2540                     | 53                               | 0                   | 5802               | 59529                        | 0             | 120.864783       |
| HVA $\rightarrow$ V1  | 0.00 - 28.58                        | 53                       | 0                         | 2630                     | 53                               | 0                   | 5786               | 56326                        | 0             | 123.706798       |
| HVA $\rightarrow$ V1  | 28.58 - 57.16                       | 53                       | 0                         | 2011                     | 53                               | 0                   | 3495               | 41530                        | 0             | 70.913483        |



**Supplemental Table 20.** Number of neurons and neuron pairs involved in the visualization of the correlation between in silico  $\Delta Ori$  and  $N_{syn}/mm L_d$  in different projection types across brain areas.

| Projection type | $\Delta$ in silico $\Delta Ori$ bin | # of presynaptic neurons | # of postsynaptic neurons | # of ADP control neurons | # of same region control neurons | # of pre-post pairs | # of pre-ADP pairs | # of pre-'same region' pairs | # of synapses | total $L_d$ (mm) |
|-----------------|-------------------------------------|--------------------------|---------------------------|--------------------------|----------------------------------|---------------------|--------------------|------------------------------|---------------|------------------|
| V1 → V1         | -57.16 - -28.58                     | 24                       | 184                       | 2256                     | 0                                | 203                 | 5252               | 0                            | 254           | 171.406452       |
| V1 → V1         | -28.58 - 0.00                       | 24                       | 302                       | 2524                     | 0                                | 336                 | 9435               | 0                            | 394           | 329.222605       |
| V1 → V1         | 0.00 - 28.58                        | 24                       | 217                       | 2816                     | 0                                | 241                 | 7546               | 0                            | 268           | 245.866967       |
| V1 → V1         | 28.58 - 57.16                       | 24                       | 144                       | 1979                     | 0                                | 157                 | 5538               | 0                            | 180           | 166.321087       |
| HVA → HVA       | -57.16 - -28.58                     | 52                       | 134                       | 1113                     | 0                                | 155                 | 5274               | 0                            | 169           | 190.852637       |
| HVA → HVA       | -28.58 - 0.00                       | 52                       | 169                       | 1165                     | 0                                | 180                 | 6698               | 0                            | 193           | 241.124324       |
| HVA → HVA       | 0.00 - 28.58                        | 52                       | 157                       | 1179                     | 0                                | 173                 | 6701               | 0                            | 181           | 240.263087       |
| HVA → HVA       | 28.58 - 57.16                       | 52                       | 129                       | 1122                     | 0                                | 150                 | 5299               | 0                            | 165           | 182.145706       |
| V1 → HVA        | -57.16 - -28.58                     | 16                       | 39                        | 479                      | 0                                | 40                  | 854                | 0                            | 48            | 23.297975        |
| V1 → HVA        | -28.58 - 0.00                       | 16                       | 35                        | 655                      | 0                                | 36                  | 1373               | 0                            | 45            | 40.063947        |
| V1 → HVA        | 0.00 - 28.58                        | 16                       | 50                        | 678                      | 0                                | 51                  | 1216               | 0                            | 54            | 34.018144        |
| V1 → HVA        | 28.58 - 57.16                       | 16                       | 28                        | 481                      | 0                                | 30                  | 925                | 0                            | 33            | 24.334127        |
| HVA → V1        | -57.16 - -28.58                     | 46                       | 73                        | 1831                     | 0                                | 75                  | 3198               | 0                            | 81            | 66.090308        |
| HVA → V1        | -28.58 - 0.00                       | 47                       | 138                       | 2502                     | 0                                | 140                 | 5974               | 0                            | 159           | 128.419254       |
| HVA → V1        | 0.00 - 28.58                        | 47                       | 140                       | 2641                     | 0                                | 149                 | 5964               | 0                            | 158           | 129.941363       |
| HVA → V1        | 28.58 - 57.16                       | 47                       | 63                        | 1867                     | 0                                | 64                  | 3187               | 0                            | 69            | 67.486736        |

**Supplemental Table 21.** Estimated marginal means of linear trends for the effect of in silico  $\Delta Ori$  on  $L_d$  / neuron pair (synapses excluded) in different projection types across brain areas. z and p-value are the z statistics and p-value of the marginal mean linear trends estimated from the fitted GLMMs. adjusted p-value is the adjusted p value through the BH multicomparison correction procedure.

| Projection type       | Coefficient | adjusted p-value | p-value  | # of presynaptic neurons | # of postsynaptic neurons | # of ADP control neurons | # of same region control neurons | # of synapses | # of pre-post pairs | # of pre-ADP pairs | # of pre-'same region' pairs |
|-----------------------|-------------|------------------|----------|--------------------------|---------------------------|--------------------------|----------------------------------|---------------|---------------------|--------------------|------------------------------|
| $V1 \rightarrow V1$   | -0.001      | 1.22e-05         | 6.11e-06 | 24                       | 0                         | 3456                     | 24                               | 0             | 0                   | 26834              | 70728                        |
| $HVA \rightarrow HVA$ | -0.001      | 4.70e-02         | 4.70e-02 | 52                       | 0                         | 1222                     | 52                               | 0             | 0                   | 23314              | 49735                        |
| $V1 \rightarrow HVA$  | -0.004      | 4.65e-08         | 1.16e-08 | 16                       | 0                         | 1123                     | 16                               | 0             | 0                   | 4211               | 18313                        |
| $HVA \rightarrow V1$  | 0.001       | 3.02e-02         | 2.27e-02 | 47                       | 0                         | 3392                     | 47                               | 0             | 0                   | 17907              | 174465                       |

**Supplemental Table 22.** Estimated marginal means of linear trends for the effect of in silico  $\Delta\text{Ori}$  on  $N_{sym}/mm L_d$  in different projection types across brain areas. z and p-value are the z statistics and p-value of the marginal mean linear trends estimated from the fitted GLMMs. adjusted p-value is the adjusted p value through the BH multicomparison correction procedure.

| Projection type | Coefficient | adjusted p-value | p-value  | # of presynaptic neurons | # of postsynaptic neurons | # of ADP control neurons | # of same region control neurons | # of synapses | # of pre-post pairs | # of pre-ADP pairs | # of pre-'same region' pairs |
|-----------------|-------------|------------------|----------|--------------------------|---------------------------|--------------------------|----------------------------------|---------------|---------------------|--------------------|------------------------------|
| V1 → V1         | -0.004      | 1.12e-03         | 2.79e-04 | 24                       | 739                       | 3456                     | 0                                | 1096          | 937                 | 27771              | 0                            |
| HVA → HVA       | 0.000       | 9.36e-01         | 9.36e-01 | 52                       | 452                       | 1222                     | 0                                | 708           | 658                 | 23972              | 0                            |
| V1 → HVA        | -0.004      | 2.33e-01         | 1.75e-01 | 16                       | 147                       | 1123                     | 0                                | 180           | 157                 | 4368               | 0                            |
| HVA → V1        | -0.002      | 2.33e-01         | 1.68e-01 | 47                       | 392                       | 3392                     | 0                                | 467           | 428                 | 18335              | 0                            |

**Supplemental Table 23.** Estimated marginal means of linear trends for the effect of in vivo signal correlation on  $L_d$  / neuron pair (synapses excluded) in different projection types across brain areas and layers. z and p-value are the z statistics and p-value of the marginal mean linear trends estimated from the fitted GLMMs. adjusted p-value is the adjusted p value through the BH multicomparison correction procedure.

| Projection type     | Coefficient | adjusted p-value | p-value   | # of presynaptic neurons | # of postsynaptic neurons | # of ADP control neurons | # of same region control neurons | # of synapses | # of pre-post pairs | # of pre-ADP pairs | # of pre-'same region' pairs |
|---------------------|-------------|------------------|-----------|--------------------------|---------------------------|--------------------------|----------------------------------|---------------|---------------------|--------------------|------------------------------|
| V1L2/3 → V1L2/3     | 1.074       | 2.49e-109        | 2.08e-110 | 20                       | 0                         | 2670                     | 20                               | 0             | 0                   | 20511              | 44349                        |
| V1L2/3 → V1L4       | 0.341       | 1.52e-07         | 7.59e-08  | 19                       | 0                         | 2090                     | 19                               | 0             | 0                   | 13791              | 32623                        |
| V1L2/3 → V1L5       | 0.580       | 6.10e-18         | 1.27e-18  | 20                       | 0                         | 1185                     | 20                               | 0             | 0                   | 11845              | 14652                        |
| V1L2/3 → HV AL2/3   | 1.210       | 1.21e-25         | 2.02e-26  | 15                       | 0                         | 1169                     | 15                               | 0             | 0                   | 4610               | 18075                        |
| V1L2/3 → HV AL4     | 0.798       | 1.26e-07         | 5.78e-08  | 14                       | 0                         | 856                      | 14                               | 0             | 0                   | 3202               | 10900                        |
| V1L2/3 → HV AL5     | 1.136       | 1.84e-11         | 4.61e-12  | 13                       | 0                         | 429                      | 13                               | 0             | 0                   | 2444               | 4028                         |
| V1L4 → V1L2/3       | 0.335       | 5.41e-03         | 4.51e-03  | 6                        | 0                         | 1784                     | 6                                | 0             | 0                   | 3107               | 16451                        |
| V1L4 → V1L4         | 0.422       | 1.22e-04         | 8.12e-05  | 6                        | 0                         | 1865                     | 6                                | 0             | 0                   | 4503               | 10073                        |
| V1L4 → V1L5         | 0.435       | 1.04e-04         | 6.51e-05  | 6                        | 0                         | 1138                     | 6                                | 0             | 0                   | 3365               | 4636                         |
| V1L5 → V1L4         | 0.407       | 1.85e-04         | 1.31e-04  | 6                        | 0                         | 1769                     | 6                                | 0             | 0                   | 3980               | 10686                        |
| V1L5 → V1L5         | 0.523       | 6.94e-09         | 2.60e-09  | 6                        | 0                         | 1145                     | 6                                | 0             | 0                   | 3721               | 4280                         |
| HV AL2/3 → V1L2/3   | 0.067       | 3.37e-01         | 3.09e-01  | 36                       | 0                         | 2626                     | 36                               | 0             | 0                   | 12670              | 104893                       |
| HV AL2/3 → V1L4     | -0.024      | 8.66e-01         | 8.30e-01  | 28                       | 0                         | 1882                     | 28                               | 0             | 0                   | 5122               | 63511                        |
| HV AL2/3 → V1L5     | 0.361       | 4.28e-08         | 1.78e-08  | 59                       | 0                         | 1172                     | 59                               | 0             | 0                   | 12966              | 66476                        |
| HV AL2/3 → HV AL2/3 | 1.089       | 3.19e-121        | 1.33e-122 | 45                       | 0                         | 1264                     | 45                               | 0             | 0                   | 19194              | 48691                        |
| HV AL2/3 → HV AL4   | 0.831       | 3.91e-42         | 4.89e-43  | 38                       | 0                         | 893                      | 38                               | 0             | 0                   | 13326              | 24937                        |
| HV AL2/3 → HV AL5   | 0.280       | 1.10e-05         | 6.07e-06  | 62                       | 0                         | 439                      | 62                               | 0             | 0                   | 13451              | 17560                        |
| HV AL4 → HV AL2/3   | 0.633       | 5.28e-09         | 1.76e-09  | 12                       | 0                         | 1233                     | 12                               | 0             | 0                   | 5899               | 12092                        |
| HV AL4 → HV AL4     | 0.679       | 1.93e-09         | 5.62e-10  | 12                       | 0                         | 893                      | 12                               | 0             | 0                   | 5266               | 6729                         |
| HV AL4 → HV AL5     | 0.355       | 7.93e-03         | 6.94e-03  | 11                       | 0                         | 434                      | 11                               | 0             | 0                   | 2992               | 2477                         |
| HV AL5 → V1L5       | -0.013      | 9.11e-01         | 9.11e-01  | 14                       | 0                         | 1093                     | 14                               | 0             | 0                   | 3539               | 15315                        |
| HV AL5 → HV AL2/3   | 0.332       | 1.38e-03         | 1.04e-03  | 17                       | 0                         | 1236                     | 17                               | 0             | 0                   | 7564               | 18063                        |
| HV AL5 → HV AL4     | 0.326       | 4.43e-03         | 3.51e-03  | 17                       | 0                         | 896                      | 17                               | 0             | 0                   | 6110               | 11017                        |
| HV AL5 → HV AL5     | 0.458       | 1.10e-05         | 6.39e-06  | 19                       | 0                         | 439                      | 19                               | 0             | 0                   | 5390               | 4009                         |

**Supplemental Table 24.** Estimated marginal means of linear trends for the effect of in vivo signal correlation on  $N_{syn}/mm L_d$  in different projection types across brain areas and layers. z and p-value are the z statistics and p-value of the marginal mean linear trends estimated from the fitted GLMMs. adjusted p-value is the adjusted p value through the BH multicomparison correction procedure.

| Projection type   | Coefficient | adjusted p-value | p-value  | # of presynaptic neurons | # of postsynaptic neurons | # of ADP control neurons | # of same region control neurons | # of synapses | # of pre-post pairs | # of pre-ADP pairs | # of pre-'same region' pairs |
|-------------------|-------------|------------------|----------|--------------------------|---------------------------|--------------------------|----------------------------------|---------------|---------------------|--------------------|------------------------------|
| V1L2/3 → V1L2/3   | 1.110       | 2.08e-06         | 1.73e-07 | 20                       | 604                       | 2670                     | 0                                | 792           | 736                 | 21247              | 0                            |
| V1L2/3 → V1L4     | 0.617       | 1.33e-01         | 8.35e-02 | 19                       | 197                       | 2090                     | 0                                | 235           | 219                 | 14010              | 0                            |
| V1L2/3 → V1L5     | 1.820       | 3.11e-19         | 1.29e-20 | 20                       | 311                       | 1185                     | 0                                | 687           | 539                 | 12384              | 0                            |
| V1L2/3 → HVAL2/3  | 0.618       | 2.18e-01         | 1.54e-01 | 15                       | 176                       | 1169                     | 0                                | 208           | 196                 | 4806               | 0                            |
| V1L2/3 → HVAL4    | 1.080       | 1.33e-01         | 8.90e-02 | 14                       | 80                        | 856                      | 0                                | 89            | 82                  | 3284               | 0                            |
| V1L2/3 → HVAL5    | 1.225       | 3.34e-02         | 1.81e-02 | 13                       | 91                        | 429                      | 0                                | 131           | 106                 | 2550               | 0                            |
| V1L4 → V1L2/3     | 0.674       | 2.20e-01         | 1.65e-01 | 6                        | 108                       | 1784                     | 0                                | 120           | 110                 | 3217               | 0                            |
| V1L4 → V1L4       | 1.162       | 1.10e-02         | 4.57e-03 | 6                        | 141                       | 1865                     | 0                                | 155           | 146                 | 4649               | 0                            |
| V1L4 → V1L5       | 1.759       | 4.71e-05         | 7.85e-06 | 6                        | 101                       | 1138                     | 0                                | 130           | 110                 | 3475               | 0                            |
| V1L5 → V1L4       | -1.058      | 2.24e-01         | 1.78e-01 | 6                        | 64                        | 1769                     | 0                                | 65            | 64                  | 4044               | 0                            |
| V1L5 → V1L5       | 0.916       | 2.64e-02         | 1.21e-02 | 6                        | 103                       | 1145                     | 0                                | 121           | 104                 | 3825               | 0                            |
| HVAL2/3 → V1L2/3  | 0.880       | 8.21e-03         | 3.08e-03 | 36                       | 381                       | 2626                     | 0                                | 436           | 411                 | 13081              | 0                            |
| HVAL2/3 → V1L4    | 1.346       | 6.96e-02         | 4.06e-02 | 28                       | 79                        | 1882                     | 0                                | 88            | 81                  | 5203               | 0                            |
| HVAL2/3 → V1L5    | 1.378       | 4.12e-05         | 5.16e-06 | 59                       | 213                       | 1172                     | 0                                | 324           | 278                 | 13244              | 0                            |
| HVAL2/3 → HVAL2/3 | -0.083      | 7.29e-01         | 6.98e-01 | 45                       | 519                       | 1264                     | 0                                | 801           | 732                 | 19926              | 0                            |
| HVAL2/3 → HVAL4   | 1.223       | 4.13e-04         | 1.03e-04 | 38                       | 204                       | 893                      | 0                                | 301           | 258                 | 13584              | 0                            |
| HVAL2/3 → HVAL5   | 1.188       | 5.20e-05         | 1.08e-05 | 62                       | 216                       | 439                      | 0                                | 410           | 361                 | 13812              | 0                            |
| HVAL4 → HVAL2/3   | 0.843       | 3.34e-02         | 1.70e-02 | 12                       | 259                       | 1233                     | 0                                | 334           | 316                 | 6215               | 0                            |
| HVAL4 → HVAL4     | 1.349       | 8.21e-03         | 2.89e-03 | 12                       | 138                       | 893                      | 0                                | 174           | 155                 | 5421               | 0                            |
| HVAL4 → HVAL5     | 1.836       | 4.71e-03         | 1.37e-03 | 11                       | 89                        | 434                      | 0                                | 108           | 97                  | 3089               | 0                            |
| HVAL5 → V1L5      | -0.416      | 6.32e-01         | 5.79e-01 | 14                       | 59                        | 1093                     | 0                                | 67            | 62                  | 3601               | 0                            |
| HVAL5 → HVAL2/3   | 0.094       | 8.17e-01         | 8.17e-01 | 17                       | 260                       | 1236                     | 0                                | 331           | 308                 | 7872               | 0                            |
| HVAL5 → HVAL4     | 0.672       | 3.11e-01         | 2.62e-01 | 17                       | 92                        | 896                      | 0                                | 110           | 102                 | 6212               | 0                            |
| HVAL5 → HVAL5     | 0.460       | 3.11e-01         | 2.72e-01 | 19                       | 148                       | 439                      | 0                                | 214           | 196                 | 5586               | 0                            |

**Supplemental Table 25.** Estimated marginal means of linear trends for the effect of in silico signal correlation on  $L_d$  / neuron pair (synapses excluded) in different projection types across brain areas and layers. z and p-value are the z statistics and p-value of the marginal mean linear trends estimated from the fitted GLMMs. adjusted p-value is the adjusted p value through the BH multicomparison correction procedure.

| Projection type     | Coefficient | adjusted p-value | p-value   | # of presynaptic neurons | # of postsynaptic neurons | # of ADP control neurons | # of same region control neurons | # of synapses | # of pre-post pairs | # of pre-ADP pairs | # of pre-'same region' pairs |
|---------------------|-------------|------------------|-----------|--------------------------|---------------------------|--------------------------|----------------------------------|---------------|---------------------|--------------------|------------------------------|
| V1L2/3 → V1L2/3     | 1.692       | 6.20e-109        | 5.17e-110 | 20                       | 0                         | 2670                     | 20                               | 0             | 0                   | 20511              | 44349                        |
| V1L2/3 → V1L4       | 0.632       | 9.58e-10         | 5.19e-10  | 19                       | 0                         | 2090                     | 19                               | 0             | 0                   | 13791              | 32623                        |
| V1L2/3 → V1L5       | 0.929       | 1.39e-17         | 5.23e-18  | 20                       | 0                         | 1185                     | 20                               | 0             | 0                   | 11845              | 14652                        |
| V1L2/3 → HV AL2/3   | 2.276       | 5.44e-33         | 9.06e-34  | 15                       | 0                         | 1169                     | 15                               | 0             | 0                   | 4610               | 18075                        |
| V1L2/3 → HV AL4     | 1.520       | 4.26e-10         | 2.13e-10  | 14                       | 0                         | 856                      | 14                               | 0             | 0                   | 3202               | 10900                        |
| V1L2/3 → HV AL5     | 0.738       | 5.58e-03         | 4.65e-03  | 13                       | 0                         | 429                      | 13                               | 0             | 0                   | 2444               | 4028                         |
| V1L4 → V1L2/3       | 0.551       | 7.48e-03         | 6.54e-03  | 6                        | 0                         | 1784                     | 6                                | 0             | 0                   | 3107               | 16451                        |
| V1L4 → V1L4         | 0.525       | 1.65e-03         | 1.25e-03  | 6                        | 0                         | 1865                     | 6                                | 0             | 0                   | 4503               | 10073                        |
| V1L4 → V1L5         | 0.538       | 1.65e-03         | 1.31e-03  | 6                        | 0                         | 1138                     | 6                                | 0             | 0                   | 3365               | 4636                         |
| V1L5 → V1L4         | 0.491       | 7.49e-03         | 6.87e-03  | 6                        | 0                         | 1769                     | 6                                | 0             | 0                   | 3980               | 10686                        |
| V1L5 → V1L5         | 0.546       | 8.97e-04         | 5.98e-04  | 6                        | 0                         | 1145                     | 6                                | 0             | 0                   | 3721               | 4280                         |
| HV AL2/3 → V1L2/3   | -0.020      | 8.30e-01         | 8.30e-01  | 36                       | 0                         | 2626                     | 36                               | 0             | 0                   | 12670              | 104893                       |
| HV AL2/3 → V1L4     | 0.473       | 1.45e-03         | 1.03e-03  | 28                       | 0                         | 1882                     | 28                               | 0             | 0                   | 5122               | 63511                        |
| HV AL2/3 → V1L5     | 0.973       | 7.73e-29         | 1.61e-29  | 59                       | 0                         | 1172                     | 59                               | 0             | 0                   | 12966              | 66476                        |
| HV AL2/3 → HV AL2/3 | 2.087       | 3.32e-246        | 1.38e-247 | 45                       | 0                         | 1264                     | 45                               | 0             | 0                   | 19194              | 48691                        |
| HV AL2/3 → HV AL4   | 1.410       | 2.16e-69         | 2.70e-70  | 38                       | 0                         | 893                      | 38                               | 0             | 0                   | 13326              | 24937                        |
| HV AL2/3 → HV AL5   | 0.116       | 1.45e-01         | 1.39e-01  | 62                       | 0                         | 439                      | 62                               | 0             | 0                   | 13451              | 17560                        |
| HV AL4 → HV AL2/3   | 1.264       | 2.34e-22         | 6.83e-23  | 12                       | 0                         | 1233                     | 12                               | 0             | 0                   | 5899               | 12092                        |
| HV AL4 → HV AL4     | 0.975       | 1.87e-13         | 8.58e-14  | 12                       | 0                         | 893                      | 12                               | 0             | 0                   | 5266               | 6729                         |
| HV AL4 → HV AL5     | 0.631       | 1.69e-04         | 1.05e-04  | 11                       | 0                         | 434                      | 11                               | 0             | 0                   | 2992               | 2477                         |
| HV AL5 → V1L5       | 0.873       | 5.35e-07         | 3.12e-07  | 14                       | 0                         | 1093                     | 14                               | 0             | 0                   | 3539               | 15315                        |
| HV AL5 → HV AL2/3   | 1.266       | 3.38e-24         | 8.45e-25  | 17                       | 0                         | 1236                     | 17                               | 0             | 0                   | 7564               | 18063                        |
| HV AL5 → HV AL4     | 1.146       | 1.40e-16         | 5.83e-17  | 17                       | 0                         | 896                      | 17                               | 0             | 0                   | 6110               | 11017                        |
| HV AL5 → HV AL5     | 1.215       | 9.66e-22         | 3.22e-22  | 19                       | 0                         | 439                      | 19                               | 0             | 0                   | 5390               | 4009                         |

**Supplemental Table 26.** Estimated marginal means of linear trends for the effect of in silico signal correlation on  $N_{syn}/mm L_d$  in different projection types across brain areas and layers. z and p-value are the z statistics and p-value of the marginal mean linear trends estimated from the fitted GLMMs. adjusted p-value is the adjusted p value through the BH multicomparison correction procedure.

| Projection type   | Coefficient | adjusted p-value | p-value  | # of presynaptic neurons | # of postsynaptic neurons | # of ADP control neurons | # of same region control neurons | # of synapses | # of pre-post pairs | # of pre-ADP pairs | # of pre-'same region' pairs |
|-------------------|-------------|------------------|----------|--------------------------|---------------------------|--------------------------|----------------------------------|---------------|---------------------|--------------------|------------------------------|
| V1L2/3 → V1L2/3   | 2.026       | 2.87e-09         | 3.58e-10 | 20                       | 604                       | 2670                     | 0                                | 792           | 736                 | 21247              | 0                            |
| V1L2/3 → V1L4     | 2.973       | 1.67e-07         | 3.47e-08 | 19                       | 197                       | 2090                     | 0                                | 235           | 219                 | 14010              | 0                            |
| V1L2/3 → V1L5     | 4.022       | 1.75e-39         | 7.29e-41 | 20                       | 311                       | 1185                     | 0                                | 687           | 539                 | 12384              | 0                            |
| V1L2/3 → HVAL2/3  | 0.808       | 3.52e-01         | 2.93e-01 | 15                       | 176                       | 1169                     | 0                                | 208           | 196                 | 4806               | 0                            |
| V1L2/3 → HVAL4    | 2.167       | 9.18e-02         | 6.12e-02 | 14                       | 80                        | 856                      | 0                                | 89            | 82                  | 3284               | 0                            |
| V1L2/3 → HVAL5    | 3.941       | 3.48e-06         | 1.16e-06 | 13                       | 91                        | 429                      | 0                                | 131           | 106                 | 2550               | 0                            |
| V1L4 → V1L2/3     | 1.097       | 2.48e-01         | 1.86e-01 | 6                        | 108                       | 1784                     | 0                                | 120           | 110                 | 3217               | 0                            |
| V1L4 → V1L4       | 2.180       | 5.08e-04         | 1.90e-04 | 6                        | 141                       | 1865                     | 0                                | 155           | 146                 | 4649               | 0                            |
| V1L4 → V1L5       | 3.194       | 7.21e-09         | 1.20e-09 | 6                        | 101                       | 1138                     | 0                                | 130           | 110                 | 3475               | 0                            |
| V1L5 → V1L4       | -1.271      | 3.52e-01         | 2.87e-01 | 6                        | 64                        | 1769                     | 0                                | 65            | 64                  | 4044               | 0                            |
| V1L5 → V1L5       | 1.508       | 5.43e-02         | 2.94e-02 | 6                        | 103                       | 1145                     | 0                                | 121           | 104                 | 3825               | 0                            |
| HVAL2/3 → V1L2/3  | 0.837       | 9.18e-02         | 5.90e-02 | 36                       | 381                       | 2626                     | 0                                | 436           | 411                 | 13081              | 0                            |
| HVAL2/3 → V1L4    | 1.304       | 2.15e-01         | 1.52e-01 | 28                       | 79                        | 1882                     | 0                                | 88            | 81                  | 5203               | 0                            |
| HVAL2/3 → V1L5    | 2.730       | 1.70e-10         | 1.42e-11 | 59                       | 213                       | 1172                     | 0                                | 324           | 278                 | 13244              | 0                            |
| HVAL2/3 → HVAL2/3 | -0.108      | 7.41e-01         | 7.19e-01 | 45                       | 519                       | 1264                     | 0                                | 801           | 732                 | 19926              | 0                            |
| HVAL2/3 → HVAL4   | 1.585       | 9.99e-04         | 4.16e-04 | 38                       | 204                       | 893                      | 0                                | 301           | 258                 | 13584              | 0                            |
| HVAL2/3 → HVAL5   | 1.834       | 2.24e-06         | 5.61e-07 | 62                       | 216                       | 439                      | 0                                | 410           | 361                 | 13812              | 0                            |
| HVAL4 → HVAL2/3   | 1.203       | 2.36e-02         | 1.18e-02 | 12                       | 259                       | 1233                     | 0                                | 334           | 316                 | 6215               | 0                            |
| HVAL4 → HVAL4     | 2.515       | 2.28e-06         | 6.64e-07 | 12                       | 138                       | 893                      | 0                                | 174           | 155                 | 5421               | 0                            |
| HVAL4 → HVAL5     | 2.154       | 5.01e-03         | 2.30e-03 | 11                       | 89                        | 434                      | 0                                | 108           | 97                  | 3089               | 0                            |
| HVAL5 → V1L5      | 1.878       | 8.64e-02         | 5.04e-02 | 14                       | 59                        | 1093                     | 0                                | 67            | 62                  | 3601               | 0                            |
| HVAL5 → HVAL2/3   | 0.308       | 5.91e-01         | 5.17e-01 | 17                       | 260                       | 1236                     | 0                                | 331           | 308                 | 7872               | 0                            |
| HVAL5 → HVAL4     | 0.248       | 7.41e-01         | 7.41e-01 | 17                       | 92                        | 896                      | 0                                | 110           | 102                 | 6212               | 0                            |
| HVAL5 → HVAL5     | 0.313       | 6.00e-01         | 5.50e-01 | 19                       | 148                       | 439                      | 0                                | 214           | 196                 | 5586               | 0                            |

**Supplemental Table 27.** Estimated marginal means of linear trends for the effect of feature weight similarity on  $L_d$  / neuron pair (synapses excluded) in different projection types across brain areas and layers. z and p-value are the z statistics and p-value of the marginal mean linear trends estimated from the fitted GLMMs. adjusted p-value is the adjusted p value through the BH multicomparison correction procedure.

| Projection type   | Coefficient | adjusted p-value | p-value   | # of presynaptic neurons | # of postsynaptic neurons | # of ADP control neurons | # of same region control neurons | # of synapses | # of pre-post pairs | # of pre-ADP pairs | # of pre-'same region' pairs |
|-------------------|-------------|------------------|-----------|--------------------------|---------------------------|--------------------------|----------------------------------|---------------|---------------------|--------------------|------------------------------|
| V1L2/3 → V1L2/3   | 1.005       | 8.41e-38         | 1.05e-38  | 20                       | 0                         | 2670                     | 20                               | 0             | 0                   | 20511              | 44349                        |
| V1L2/3 → V1L4     | 0.512       | 9.17e-07         | 4.59e-07  | 19                       | 0                         | 2090                     | 19                               | 0             | 0                   | 13791              | 32623                        |
| V1L2/3 → V1L5     | 0.602       | 8.40e-08         | 3.85e-08  | 20                       | 0                         | 1185                     | 20                               | 0             | 0                   | 11845              | 14652                        |
| V1L2/3 → HVAL2/3  | 0.849       | 1.12e-05         | 6.97e-06  | 15                       | 0                         | 1169                     | 15                               | 0             | 0                   | 4610               | 18075                        |
| V1L2/3 → HVAL4    | 0.804       | 1.27e-03         | 9.01e-04  | 14                       | 0                         | 856                      | 14                               | 0             | 0                   | 3202               | 10900                        |
| V1L2/3 → HVAL5    | 0.410       | 1.34e-01         | 1.28e-01  | 13                       | 0                         | 429                      | 13                               | 0             | 0                   | 2444               | 4028                         |
| V1L4 → V1L2/3     | 0.257       | 2.09e-01         | 2.09e-01  | 6                        | 0                         | 1784                     | 6                                | 0             | 0                   | 3107               | 16451                        |
| V1L4 → V1L4       | 0.769       | 1.79e-06         | 9.70e-07  | 6                        | 0                         | 1865                     | 6                                | 0             | 0                   | 4503               | 10073                        |
| V1L4 → V1L5       | 0.663       | 2.60e-04         | 1.73e-04  | 6                        | 0                         | 1138                     | 6                                | 0             | 0                   | 3365               | 4636                         |
| V1L5 → V1L4       | 0.465       | 1.66e-02         | 1.25e-02  | 6                        | 0                         | 1769                     | 6                                | 0             | 0                   | 3980               | 10686                        |
| V1L5 → V1L5       | 0.361       | 3.27e-02         | 2.87e-02  | 6                        | 0                         | 1145                     | 6                                | 0             | 0                   | 3721               | 4280                         |
| HVAL2/3 → V1L2/3  | 0.251       | 2.75e-02         | 2.17e-02  | 36                       | 0                         | 2626                     | 36                               | 0             | 0                   | 12670              | 104893                       |
| HVAL2/3 → V1L4    | 0.378       | 3.17e-02         | 2.64e-02  | 28                       | 0                         | 1882                     | 28                               | 0             | 0                   | 5122               | 63511                        |
| HVAL2/3 → V1L5    | 1.078       | 5.07e-22         | 1.06e-22  | 59                       | 0                         | 1172                     | 59                               | 0             | 0                   | 12966              | 66476                        |
| HVAL2/3 → HVAL2/3 | 2.692       | 3.67e-248        | 1.53e-249 | 45                       | 0                         | 1264                     | 45                               | 0             | 0                   | 19194              | 48691                        |
| HVAL2/3 → HVAL4   | 2.013       | 5.69e-83         | 4.74e-84  | 38                       | 0                         | 893                      | 38                               | 0             | 0                   | 13326              | 24937                        |
| HVAL2/3 → HVAL5   | 0.885       | 1.56e-17         | 5.20e-18  | 62                       | 0                         | 439                      | 62                               | 0             | 0                   | 13451              | 17560                        |
| HVAL4 → HVAL2/3   | 1.560       | 2.27e-24         | 3.78e-25  | 12                       | 0                         | 1233                     | 12                               | 0             | 0                   | 5899               | 12092                        |
| HVAL4 → HVAL4     | 1.436       | 1.03e-21         | 2.57e-22  | 12                       | 0                         | 893                      | 12                               | 0             | 0                   | 5266               | 6729                         |
| HVAL4 → HVAL5     | 0.884       | 2.15e-06         | 1.25e-06  | 11                       | 0                         | 434                      | 11                               | 0             | 0                   | 2992               | 2477                         |
| HVAL5 → V1L5      | 1.169       | 1.05e-09         | 4.38e-10  | 14                       | 0                         | 1093                     | 14                               | 0             | 0                   | 3539               | 15315                        |
| HVAL5 → HVAL2/3   | 0.273       | 6.10e-02         | 5.59e-02  | 17                       | 0                         | 1236                     | 17                               | 0             | 0                   | 7564               | 18063                        |
| HVAL5 → HVAL4     | 1.195       | 3.89e-14         | 1.46e-14  | 17                       | 0                         | 896                      | 17                               | 0             | 0                   | 6110               | 11017                        |
| HVAL5 → HVAL5     | 1.306       | 1.37e-19         | 3.99e-20  | 19                       | 0                         | 439                      | 19                               | 0             | 0                   | 5390               | 4009                         |



**Supplemental Table 28.** Estimated marginal means of linear trends for the effect of feature weight similarity on  $N_{syn}/mm L_d$  in different projection types across brain areas and layers. z and p-value are the z statistics and p-value of the marginal mean linear trends estimated from the fitted GLMMs. adjusted p-value is the adjusted p value through the BH multicomparison correction procedure.

| Projection type   | Coefficient | adjusted p-value | p-value  | # of presynaptic neurons | # of postsynaptic neurons | # of ADP control neurons | # of same region control neurons | # of synapses | # of pre-post pairs | # of pre-ADP pairs | # of pre-'same region' pairs |
|-------------------|-------------|------------------|----------|--------------------------|---------------------------|--------------------------|----------------------------------|---------------|---------------------|--------------------|------------------------------|
| V1L2/3 → V1L2/3   | 1.840       | 6.63e-07         | 1.11e-07 | 20                       | 604                       | 2670                     | 0                                | 792           | 736                 | 21247              | 0                            |
| V1L2/3 → V1L4     | 2.015       | 3.78e-03         | 1.57e-03 | 19                       | 197                       | 2090                     | 0                                | 235           | 219                 | 14010              | 0                            |
| V1L2/3 → V1L5     | 3.855       | 1.05e-25         | 4.39e-27 | 20                       | 311                       | 1185                     | 0                                | 687           | 539                 | 12384              | 0                            |
| V1L2/3 → HVAL2/3  | 0.715       | 3.77e-01         | 3.45e-01 | 15                       | 176                       | 1169                     | 0                                | 208           | 196                 | 4806               | 0                            |
| V1L2/3 → HVAL4    | -0.143      | 9.04e-01         | 9.04e-01 | 14                       | 80                        | 856                      | 0                                | 89            | 82                  | 3284               | 0                            |
| V1L2/3 → HVAL5    | 3.330       | 4.87e-04         | 1.83e-04 | 13                       | 91                        | 429                      | 0                                | 131           | 106                 | 2550               | 0                            |
| V1L4 → V1L2/3     | 1.005       | 3.28e-01         | 2.59e-01 | 6                        | 108                       | 1784                     | 0                                | 120           | 110                 | 3217               | 0                            |
| V1L4 → V1L4       | 2.416       | 4.52e-04         | 1.51e-04 | 6                        | 141                       | 1865                     | 0                                | 155           | 146                 | 4649               | 0                            |
| V1L4 → V1L5       | 4.052       | 8.61e-08         | 7.18e-09 | 6                        | 101                       | 1138                     | 0                                | 130           | 110                 | 3475               | 0                            |
| V1L5 → V1L4       | -1.410      | 3.11e-01         | 2.33e-01 | 6                        | 64                        | 1769                     | 0                                | 65            | 64                  | 4044               | 0                            |
| V1L5 → V1L5       | 0.304       | 7.36e-01         | 7.05e-01 | 6                        | 103                       | 1145                     | 0                                | 121           | 104                 | 3825               | 0                            |
| HVAL2/3 → V1L2/3  | 1.248       | 3.23e-02         | 1.89e-02 | 36                       | 381                       | 2626                     | 0                                | 436           | 411                 | 13081              | 0                            |
| HVAL2/3 → V1L4    | 3.178       | 8.70e-03         | 4.35e-03 | 28                       | 79                        | 1882                     | 0                                | 88            | 81                  | 5203               | 0                            |
| HVAL2/3 → V1L5    | 3.210       | 1.28e-07         | 1.59e-08 | 59                       | 213                       | 1172                     | 0                                | 324           | 278                 | 13244              | 0                            |
| HVAL2/3 → HVAL2/3 | 0.351       | 3.77e-01         | 3.44e-01 | 45                       | 519                       | 1264                     | 0                                | 801           | 732                 | 19926              | 0                            |
| HVAL2/3 → HVAL4   | 2.861       | 7.44e-06         | 1.86e-06 | 38                       | 204                       | 893                      | 0                                | 301           | 258                 | 13584              | 0                            |
| HVAL2/3 → HVAL5   | 2.452       | 3.18e-06         | 6.63e-07 | 62                       | 216                       | 439                      | 0                                | 410           | 361                 | 13812              | 0                            |
| HVAL4 → HVAL2/3   | 1.416       | 2.23e-02         | 1.21e-02 | 12                       | 259                       | 1233                     | 0                                | 334           | 316                 | 6215               | 0                            |
| HVAL4 → HVAL4     | 2.614       | 1.54e-04         | 4.51e-05 | 12                       | 138                       | 893                      | 0                                | 174           | 155                 | 5421               | 0                            |
| HVAL4 → HVAL5     | 2.486       | 8.70e-03         | 4.12e-03 | 11                       | 89                        | 434                      | 0                                | 108           | 97                  | 3089               | 0                            |
| HVAL5 → V1L5      | 1.423       | 2.89e-01         | 2.05e-01 | 14                       | 59                        | 1093                     | 0                                | 67            | 62                  | 3601               | 0                            |
| HVAL5 → HVAL2/3   | 0.794       | 2.51e-01         | 1.67e-01 | 17                       | 260                       | 1236                     | 0                                | 331           | 308                 | 7872               | 0                            |
| HVAL5 → HVAL4     | -0.926      | 3.54e-01         | 2.95e-01 | 17                       | 92                        | 896                      | 0                                | 110           | 102                 | 6212               | 0                            |
| HVAL5 → HVAL5     | 1.090       | 1.09e-01         | 6.81e-02 | 19                       | 148                       | 439                      | 0                                | 214           | 196                 | 5586               | 0                            |

**Supplemental Table 29.** Estimated marginal means of linear trends for the effect of receptive field center distance on  $L_d$  / neuron pair (synapses excluded) in different projection types across brain areas and layers. z and p-value are the z statistics and p-value of the marginal mean linear trends estimated from the fitted GLMMs. adjusted p-value is the adjusted p value through the BH multicomparison correction procedure.

| Projection type     | Coefficient | adjusted p-value | p-value   | # of presynaptic neurons | # of postsynaptic neurons | # of ADP control neurons | # of same region control neurons | # of synapses | # of pre-post pairs | # of pre-ADP pairs | # of pre-'same region' pairs |
|---------------------|-------------|------------------|-----------|--------------------------|---------------------------|--------------------------|----------------------------------|---------------|---------------------|--------------------|------------------------------|
| V1L2/3 → V1L2/3     | -0.167      | 0.00e+00         | 0.00e+00  | 20                       | 0                         | 2670                     | 20                               | 0             | 0                   | 20511              | 44349                        |
| V1L2/3 → V1L4       | -0.141      | 0.00e+00         | 0.00e+00  | 19                       | 0                         | 2090                     | 19                               | 0             | 0                   | 13791              | 32623                        |
| V1L2/3 → V1L5       | -0.111      | 0.00e+00         | 0.00e+00  | 20                       | 0                         | 1185                     | 20                               | 0             | 0                   | 11845              | 14652                        |
| V1L2/3 → HV AL2/3   | -0.032      | 7.39e-21         | 6.16e-21  | 15                       | 0                         | 1169                     | 15                               | 0             | 0                   | 4610               | 18075                        |
| V1L2/3 → HV AL4     | -0.030      | 5.27e-14         | 4.83e-14  | 14                       | 0                         | 856                      | 14                               | 0             | 0                   | 3202               | 10900                        |
| V1L2/3 → HV AL5     | -0.014      | 4.94e-03         | 4.94e-03  | 13                       | 0                         | 429                      | 13                               | 0             | 0                   | 2444               | 4028                         |
| V1L4 → V1L2/3       | -0.097      | 1.11e-68         | 7.42e-69  | 6                        | 0                         | 1784                     | 6                                | 0             | 0                   | 3107               | 16451                        |
| V1L4 → V1L4         | -0.136      | 1.76e-189        | 5.14e-190 | 6                        | 0                         | 1865                     | 6                                | 0             | 0                   | 4503               | 10073                        |
| V1L4 → V1L5         | -0.134      | 8.03e-134        | 4.01e-134 | 6                        | 0                         | 1138                     | 6                                | 0             | 0                   | 3365               | 4636                         |
| V1L5 → V1L4         | -0.053      | 2.71e-27         | 2.14e-27  | 6                        | 0                         | 1769                     | 6                                | 0             | 0                   | 3980               | 10686                        |
| V1L5 → V1L5         | -0.092      | 1.19e-80         | 7.44e-81  | 6                        | 0                         | 1145                     | 6                                | 0             | 0                   | 3721               | 4280                         |
| HV AL2/3 → V1L2/3   | -0.015      | 7.37e-11         | 7.06e-11  | 36                       | 0                         | 2626                     | 36                               | 0             | 0                   | 12670              | 104893                       |
| HV AL2/3 → V1L4     | -0.031      | 1.82e-16         | 1.60e-16  | 28                       | 0                         | 1882                     | 28                               | 0             | 0                   | 5122               | 63511                        |
| HV AL2/3 → V1L5     | -0.035      | 1.25e-46         | 9.39e-47  | 59                       | 0                         | 1172                     | 59                               | 0             | 0                   | 12966              | 66476                        |
| HV AL2/3 → HV AL2/3 | -0.099      | 0.00e+00         | 0.00e+00  | 45                       | 0                         | 1264                     | 45                               | 0             | 0                   | 19194              | 48691                        |
| HV AL2/3 → HV AL4   | -0.083      | 0.00e+00         | 0.00e+00  | 38                       | 0                         | 893                      | 38                               | 0             | 0                   | 13326              | 24937                        |
| HV AL2/3 → HV AL5   | -0.047      | 1.41e-112        | 7.63e-113 | 62                       | 0                         | 439                      | 62                               | 0             | 0                   | 13451              | 17560                        |
| HV AL4 → HV AL2/3   | -0.084      | 4.83e-169        | 1.81e-169 | 12                       | 0                         | 1233                     | 12                               | 0             | 0                   | 5899               | 12092                        |
| HV AL4 → HV AL4     | -0.093      | 2.33e-215        | 5.82e-216 | 12                       | 0                         | 893                      | 12                               | 0             | 0                   | 5266               | 6729                         |
| HV AL4 → HV AL5     | -0.109      | 5.56e-172        | 1.85e-172 | 11                       | 0                         | 434                      | 11                               | 0             | 0                   | 2992               | 2477                         |
| HV AL5 → V1L5       | -0.067      | 3.07e-53         | 2.18e-53  | 14                       | 0                         | 1093                     | 14                               | 0             | 0                   | 3539               | 15315                        |
| HV AL5 → HV AL2/3   | -0.052      | 3.63e-86         | 2.12e-86  | 17                       | 0                         | 1236                     | 17                               | 0             | 0                   | 7564               | 18063                        |
| HV AL5 → HV AL4     | -0.071      | 8.03e-134        | 3.74e-134 | 17                       | 0                         | 896                      | 17                               | 0             | 0                   | 6110               | 11017                        |
| HV AL5 → HV AL5     | -0.082      | 4.99e-159        | 2.08e-159 | 19                       | 0                         | 439                      | 19                               | 0             | 0                   | 5390               | 4009                         |

**Supplemental Table 30.** Estimated marginal means of linear trends for the effect of receptive field center distance on  $N_{syn}/mm L_d$  in different projection types across brain areas and layers. z and p-value are the z statistics and p-value of the marginal mean linear trends estimated from the fitted GLMMs. adjusted p-value is the adjusted p value through the BH multicomparison correction procedure.

| Projection type   | Coefficient | adjusted p-value | p-value  | # of presynaptic neurons | # of postsynaptic neurons | # of ADP control neurons | # of same region control neurons | # of synapses | # of pre-post pairs | # of pre-ADP pairs | # of pre-'same region' pairs |
|-------------------|-------------|------------------|----------|--------------------------|---------------------------|--------------------------|----------------------------------|---------------|---------------------|--------------------|------------------------------|
| V1L2/3 → V1L2/3   | 0.020       | 2.56e-01         | 4.26e-02 | 20                       | 604                       | 2670                     | 0                                | 792           | 736                 | 21247              | 0                            |
| V1L2/3 → V1L4     | 0.050       | 5.19e-02         | 2.16e-03 | 19                       | 197                       | 2090                     | 0                                | 235           | 219                 | 14010              | 0                            |
| V1L2/3 → V1L5     | 0.012       | 5.26e-01         | 2.27e-01 | 20                       | 311                       | 1185                     | 0                                | 687           | 539                 | 12384              | 0                            |
| V1L2/3 → HVAL2/3  | 0.008       | 8.34e-01         | 6.26e-01 | 15                       | 176                       | 1169                     | 0                                | 208           | 196                 | 4806               | 0                            |
| V1L2/3 → HVAL4    | 0.014       | 8.18e-01         | 5.11e-01 | 14                       | 80                        | 856                      | 0                                | 89            | 82                  | 3284               | 0                            |
| V1L2/3 → HVAL5    | 0.001       | 9.50e-01         | 9.50e-01 | 13                       | 91                        | 429                      | 0                                | 131           | 106                 | 2550               | 0                            |
| V1L4 → V1L2/3     | 0.020       | 8.10e-01         | 4.59e-01 | 6                        | 108                       | 1784                     | 0                                | 120           | 110                 | 3217               | 0                            |
| V1L4 → V1L4       | 0.060       | 6.82e-02         | 5.69e-03 | 6                        | 141                       | 1865                     | 0                                | 155           | 146                 | 4649               | 0                            |
| V1L4 → V1L5       | 0.042       | 3.98e-01         | 8.30e-02 | 6                        | 101                       | 1138                     | 0                                | 130           | 110                 | 3475               | 0                            |
| V1L5 → V1L4       | -0.016      | 8.34e-01         | 6.22e-01 | 6                        | 64                        | 1769                     | 0                                | 65            | 64                  | 4044               | 0                            |
| V1L5 → V1L5       | 0.034       | 5.26e-01         | 2.02e-01 | 6                        | 103                       | 1145                     | 0                                | 121           | 104                 | 3825               | 0                            |
| HVAL2/3 → V1L2/3  | -0.015      | 5.26e-01         | 2.19e-01 | 36                       | 381                       | 2626                     | 0                                | 436           | 411                 | 13081              | 0                            |
| HVAL2/3 → V1L4    | 0.004       | 9.39e-01         | 8.88e-01 | 28                       | 79                        | 1882                     | 0                                | 88            | 81                  | 5203               | 0                            |
| HVAL2/3 → V1L5    | -0.020      | 5.26e-01         | 1.37e-01 | 59                       | 213                       | 1172                     | 0                                | 324           | 278                 | 13244              | 0                            |
| HVAL2/3 → HVAL2/3 | 0.004       | 8.49e-01         | 6.74e-01 | 45                       | 519                       | 1264                     | 0                                | 801           | 732                 | 19926              | 0                            |
| HVAL2/3 → HVAL4   | -0.002      | 9.39e-01         | 8.99e-01 | 38                       | 204                       | 893                      | 0                                | 301           | 258                 | 13584              | 0                            |
| HVAL2/3 → HVAL5   | -0.004      | 8.49e-01         | 7.08e-01 | 62                       | 216                       | 439                      | 0                                | 410           | 361                 | 13812              | 0                            |
| HVAL4 → HVAL2/3   | 0.013       | 5.26e-01         | 2.41e-01 | 12                       | 259                       | 1233                     | 0                                | 334           | 316                 | 6215               | 0                            |
| HVAL4 → HVAL4     | 0.014       | 6.51e-01         | 3.26e-01 | 12                       | 138                       | 893                      | 0                                | 174           | 155                 | 5421               | 0                            |
| HVAL4 → HVAL5     | 0.048       | 1.25e-01         | 1.57e-02 | 11                       | 89                        | 434                      | 0                                | 108           | 97                  | 3089               | 0                            |
| HVAL5 → V1L5      | 0.016       | 8.34e-01         | 5.74e-01 | 14                       | 59                        | 1093                     | 0                                | 67            | 62                  | 3601               | 0                            |
| HVAL5 → HVAL2/3   | 0.008       | 8.10e-01         | 4.72e-01 | 17                       | 260                       | 1236                     | 0                                | 331           | 308                 | 7872               | 0                            |
| HVAL5 → HVAL4     | 0.021       | 5.26e-01         | 2.11e-01 | 17                       | 92                        | 896                      | 0                                | 110           | 102                 | 6212               | 0                            |
| HVAL5 → HVAL5     | -0.004      | 8.78e-01         | 7.69e-01 | 19                       | 148                       | 439                      | 0                                | 214           | 196                 | 5586               | 0                            |

**Supplemental Table 31.** Estimated marginal means of linear trends for the effect of in silico  $\Delta Ori$  on  $L_d$  / neuron pair (synapses excluded) in different projection types across brain areas and layers. z and p-value are the z statistics and p-value of the marginal mean linear trends estimated from the fitted GLMMs. adjusted p-value is the adjusted p value through the BH multicomparison correction procedure.

| Projection type                 | Coefficient | adjusted p-value | p-value  | # of presynaptic neurons | # of postsynaptic neurons | # of ADP control neurons | # of same region control neurons | # of synapses | # of pre-post pairs | # of pre-ADP pairs | # of pre-'same region' pairs |
|---------------------------------|-------------|------------------|----------|--------------------------|---------------------------|--------------------------|----------------------------------|---------------|---------------------|--------------------|------------------------------|
| <i>V1L2/3</i> → <i>V1L2/3</i>   | -0.003      | 1.22e-10         | 7.61e-12 | 12                       | 0                         | 1409                     | 12                               | 0             | 0                   | 6927               | 14702                        |
| <i>V1L2/3</i> → <i>V1L4</i>     | -0.004      | 3.52e-07         | 4.40e-08 | 9                        | 0                         | 1050                     | 9                                | 0             | 0                   | 4190               | 7845                         |
| <i>V1L2/3</i> → <i>V1L5</i>     | -0.001      | 5.15e-01         | 3.22e-01 | 12                       | 0                         | 701                      | 12                               | 0             | 0                   | 4527               | 4791                         |
| <i>V1L2/3</i> → <i>HVAL2/3</i>  | -0.006      | 3.69e-06         | 6.93e-07 | 7                        | 0                         | 487                      | 7                                | 0             | 0                   | 1354               | 3258                         |
| <i>V1L2/3</i> → <i>HVAL5</i>    | -0.003      | 9.32e-02         | 4.21e-02 | 8                        | 0                         | 224                      | 8                                | 0             | 0                   | 786                | 1249                         |
| <i>HVAL2/3</i> → <i>V1L2/3</i>  | 0.003       | 4.97e-04         | 1.24e-04 | 20                       | 0                         | 1299                     | 20                               | 0             | 0                   | 4401               | 31930                        |
| <i>HVAL2/3</i> → <i>V1L4</i>    | -0.000      | 9.42e-01         | 9.42e-01 | 16                       | 0                         | 885                      | 16                               | 0             | 0                   | 1706               | 19798                        |
| <i>HVAL2/3</i> → <i>V1L5</i>    | 0.001       | 9.32e-02         | 4.66e-02 | 30                       | 0                         | 689                      | 30                               | 0             | 0                   | 4433               | 19345                        |
| <i>HVAL2/3</i> → <i>HVAL2/3</i> | 0.000       | 8.54e-01         | 7.47e-01 | 17                       | 0                         | 557                      | 17                               | 0             | 0                   | 4103               | 7038                         |
| <i>HVAL2/3</i> → <i>HVAL4</i>   | 0.000       | 8.41e-01         | 6.83e-01 | 16                       | 0                         | 397                      | 16                               | 0             | 0                   | 2812               | 4472                         |
| <i>HVAL2/3</i> → <i>HVAL5</i>   | -0.001      | 4.10e-01         | 2.31e-01 | 27                       | 0                         | 229                      | 27                               | 0             | 0                   | 3420               | 3482                         |
| <i>HVAL4</i> → <i>HVAL2/3</i>   | -0.001      | 6.16e-01         | 4.24e-01 | 7                        | 0                         | 499                      | 7                                | 0             | 0                   | 1262               | 3344                         |
| <i>HVAL4</i> → <i>HVAL5</i>     | -0.000      | 8.41e-01         | 6.74e-01 | 7                        | 0                         | 225                      | 7                                | 0             | 0                   | 937                | 848                          |
| <i>HVAL5</i> → <i>V1L5</i>      | 0.000       | 9.42e-01         | 9.22e-01 | 9                        | 0                         | 603                      | 9                                | 0             | 0                   | 1414               | 5725                         |
| <i>HVAL5</i> → <i>HVAL2/3</i>   | 0.002       | 2.94e-02         | 9.20e-03 | 12                       | 0                         | 541                      | 12                               | 0             | 0                   | 2307               | 5594                         |
| <i>HVAL5</i> → <i>HVAL5</i>     | -0.002      | 9.32e-02         | 4.49e-02 | 14                       | 0                         | 228                      | 14                               | 0             | 0                   | 2125               | 1430                         |

**Supplemental Table 32.** Estimated marginal means of linear trends for the effect of in silico  $\Delta\text{Ori}$  on  $N_{syn}/mm L_d$  in different projection types across brain areas and layers. z and p-value are the z statistics and p-value of the marginal mean linear trends estimated from the fitted GLMMs. adjusted p-value is the adjusted p value through the BH multicomparison correction procedure.

| Projection type                 | Coefficient | adjusted p-value | p-value  | # of presynaptic neurons | # of postsynaptic neurons | # of ADP control neurons | # of same region control neurons | # of synapses | # of pre-post pairs | # of pre-ADP pairs | # of pre-'same region' pairs |
|---------------------------------|-------------|------------------|----------|--------------------------|---------------------------|--------------------------|----------------------------------|---------------|---------------------|--------------------|------------------------------|
| <i>V1L2/3</i> → <i>V1L2/3</i>   | -0.003      | 4.73e-01         | 1.80e-01 | 12                       | 246                       | 1409                     | 0                                | 296           | 272                 | 7199               | 0                            |
| <i>V1L2/3</i> → <i>V1L4</i>     | 0.005       | 4.73e-01         | 1.82e-01 | 9                        | 82                        | 1050                     | 0                                | 91            | 83                  | 4273               | 0                            |
| <i>V1L2/3</i> → <i>V1L5</i>     | -0.009      | 1.66e-03         | 1.04e-04 | 12                       | 165                       | 701                      | 0                                | 323           | 245                 | 4772               | 0                            |
| <i>V1L2/3</i> → <i>HVAL2/3</i>  | 0.001       | 8.89e-01         | 8.89e-01 | 7                        | 52                        | 487                      | 0                                | 54            | 53                  | 1407               | 0                            |
| <i>V1L2/3</i> → <i>HVAL5</i>    | -0.014      | 8.07e-02         | 1.01e-02 | 8                        | 38                        | 224                      | 0                                | 51            | 40                  | 826                | 0                            |
| <i>HVAL2/3</i> → <i>V1L2/3</i>  | -0.004      | 4.73e-01         | 2.37e-01 | 20                       | 123                       | 1299                     | 0                                | 134           | 129                 | 4530               | 0                            |
| <i>HVAL2/3</i> → <i>V1L4</i>    | -0.012      | 4.04e-01         | 7.57e-02 | 16                       | 33                        | 885                      | 0                                | 36            | 33                  | 1739               | 0                            |
| <i>HVAL2/3</i> → <i>V1L5</i>    | -0.002      | 7.20e-01         | 6.06e-01 | 30                       | 97                        | 689                      | 0                                | 123           | 109                 | 4542               | 0                            |
| <i>HVAL2/3</i> → <i>HVAL2/3</i> | -0.001      | 7.20e-01         | 6.07e-01 | 17                       | 145                       | 557                      | 0                                | 192           | 177                 | 4280               | 0                            |
| <i>HVAL2/3</i> → <i>HVAL4</i>   | 0.002       | 7.31e-01         | 6.85e-01 | 16                       | 59                        | 397                      | 0                                | 70            | 67                  | 2879               | 0                            |
| <i>HVAL2/3</i> → <i>HVAL5</i>   | 0.004       | 4.73e-01         | 2.07e-01 | 27                       | 80                        | 229                      | 0                                | 122           | 106                 | 3526               | 0                            |
| <i>HVAL4</i> → <i>HVAL2/3</i>   | 0.005       | 5.95e-01         | 3.35e-01 | 7                        | 55                        | 499                      | 0                                | 59            | 59                  | 1321               | 0                            |
| <i>HVAL4</i> → <i>HVAL5</i>     | -0.009      | 4.73e-01         | 1.49e-01 | 7                        | 29                        | 225                      | 0                                | 32            | 30                  | 967                | 0                            |
| <i>HVAL5</i> → <i>V1L5</i>      | -0.003      | 7.20e-01         | 6.30e-01 | 9                        | 25                        | 603                      | 0                                | 31            | 26                  | 1440               | 0                            |
| <i>HVAL5</i> → <i>HVAL2/3</i>   | -0.002      | 7.20e-01         | 5.38e-01 | 12                       | 87                        | 541                      | 0                                | 106           | 98                  | 2405               | 0                            |
| <i>HVAL5</i> → <i>HVAL5</i>     | -0.004      | 6.13e-01         | 3.83e-01 | 14                       | 56                        | 228                      | 0                                | 71            | 67                  | 2192               | 0                            |

**Supplemental Table 33.** Paired t-tests for comparing the mean presyn-postsyn functional similarity between observation in the MICrONS dataset and values expected by GLMMs fit on the MICrONS dataset

| Projection type         | Comparison                            | t-statistic | p-value  | adjusted p-value |
|-------------------------|---------------------------------------|-------------|----------|------------------|
| <i>HVA</i> → <i>HVA</i> | observed vs expected                  | 660.0       | 7.92e-01 | 9.81e-01         |
| <i>HVA</i> → <i>V1</i>  | observed vs expected                  | 362.0       | 9.09e-01 | 9.81e-01         |
| <i>V1</i> → <i>HVA</i>  | observed vs expected                  | 62.0        | 5.17e-01 | 9.81e-01         |
| <i>V1</i> → <i>V1</i>   | observed vs expected                  | 313.0       | 9.81e-01 | 9.81e-01         |
| <i>HVA</i> → <i>HVA</i> | observed vs expected (synaptic scale) | 675.0       | 8.99e-01 | 9.81e-01         |
| <i>HVA</i> → <i>V1</i>  | observed vs expected (synaptic scale) | 349.0       | 7.63e-01 | 9.81e-01         |
| <i>V1</i> → <i>HVA</i>  | observed vs expected (synaptic scale) | 71.0        | 8.18e-01 | 9.81e-01         |
| <i>V1</i> → <i>V1</i>   | observed vs expected (synaptic scale) | 280.0       | 5.76e-01 | 9.81e-01         |
| <i>HVA</i> → <i>HVA</i> | observed vs expected (axonal scale)   | 629.0       | 5.85e-01 | 9.81e-01         |
| <i>HVA</i> → <i>V1</i>  | observed vs expected (axonal scale)   | 349.0       | 7.63e-01 | 9.81e-01         |
| <i>V1</i> → <i>HVA</i>  | observed vs expected (axonal scale)   | 63.0        | 5.48e-01 | 9.81e-01         |
| <i>V1</i> → <i>V1</i>   | observed vs expected (axonal scale)   | 284.0       | 6.22e-01 | 9.81e-01         |

**Supplemental Table 34.** Paired t-tests for comparing the mean postsyn-postsyn functional similarity between observation in the MICrONS dataset and values expected by GLMMs fit on the MICrONS dataset

| Projection type         | Comparison                            | t-statistic | p-value  | adjusted p-value |
|-------------------------|---------------------------------------|-------------|----------|------------------|
| <i>HVA</i> → <i>HVA</i> | observed vs expected                  | 254.0       | 7.45e-05 | 1.79e-04         |
| <i>HVA</i> → <i>V1</i>  | observed vs expected                  | 46.0        | 1.39e-07 | 5.56e-07         |
| <i>V1</i> → <i>HVA</i>  | observed vs expected                  | 53.0        | 2.84e-01 | 2.84e-01         |
| <i>V1</i> → <i>V1</i>   | observed vs expected                  | 45.0        | 9.74e-07 | 2.92e-06         |
| <i>HVA</i> → <i>HVA</i> | observed vs expected (synaptic scale) | 344.0       | 1.68e-03 | 2.52e-03         |
| <i>HVA</i> → <i>V1</i>  | observed vs expected (synaptic scale) | 125.0       | 2.00e-04 | 3.99e-04         |
| <i>V1</i> → <i>HVA</i>  | observed vs expected (synaptic scale) | 32.0        | 3.48e-02 | 4.64e-02         |
| <i>V1</i> → <i>V1</i>   | observed vs expected (synaptic scale) | 197.0       | 5.35e-02 | 6.42e-02         |
| <i>HVA</i> → <i>HVA</i> | observed vs expected (axonal scale)   | 344.0       | 1.68e-03 | 2.52e-03         |
| <i>HVA</i> → <i>V1</i>  | observed vs expected (axonal scale)   | 19.0        | 2.23e-09 | 1.34e-08         |
| <i>V1</i> → <i>HVA</i>  | observed vs expected (axonal scale)   | 53.0        | 2.84e-01 | 2.84e-01         |
| <i>V1</i> → <i>V1</i>   | observed vs expected (axonal scale)   | 5.0         | 5.82e-10 | 6.98e-09         |
